# Supplementary material for: Water–SDS–[BMIm]Br composite system for one-pot multicomponent synthesis of pyrano[2,3-c]pyrazole derivatives and their structural assessment by NMR, X-ray, and DFT studies
Source: Royal Society of Chemistry journal article supplement (doi:10.1039/d3ra00137g), 2023-01-01
Supplement: d3ra00137g1.pdf [file d3ra00137g1.pdf]

## Supporting Information

### Water-SDS-[BMIm]Br composite system for one-pot multicomponent synthesis of pyrano[2,3-c]pyrazole derivatives and their structural assessment by NMR, X-ray, and DFT studies

Sourav Chakraborty,<sup>a</sup> Bhaswati Paul,<sup>b</sup> Utpal Chandra De,<sup>a</sup> Ramalingam Natarajan,<sup>b</sup> and Swapan Majumdar\*<sup>a</sup>

<sup>a</sup>Department of Chemistry, Tripura University, Suryamaninagar, 799 022, INDIA; Tel: +91-381-237-9070; Fax: +91-381-2374802

E-mail: smajumdar@tripurauniv.ac.in

<sup>b</sup>CSIR-Indian Institute of Chemical Biology, 4, Raja S. C. Mullick Road, Kolkata 700 032, INDIA

| Topics                                                                          | Contents | Pages |
|---------------------------------------------------------------------------------|----------|-------|
| Experimental Section: General                                                   |          | 2     |
| Experimental procedure for the synthesis of <b>1a'-e'</b> and <b>1f-o</b>       |          | 2     |
| Physical and spectral data <b>1a'-e'</b> and <b>1f-o</b>                        |          | 3     |
| <sup>1</sup> H and <sup>13</sup> C NMR spectra of <b>1a'-e'</b> and <b>1f-o</b> |          | 9     |
| HRMS of <b>1n</b> and <b>1o</b>                                                 |          | 27    |
| <sup>1</sup> H- <sup>1</sup> H COSY of <b>1f</b>                                |          | 28    |
| NOESY spectrum of <b>1r</b>                                                     |          | 28    |
| References                                                                      |          | 29    |
| X-ray crystallographic data of <b>1n</b> and <b>1o</b>                          |          | 30    |

## Experimental section

### General

The starting aldehydes (aromatic, aliphatic, heterocyclic etc.), malonitrile, Ethyl acetoacetate, hydrazine, phenyl hydrazine, SDS were purchased from either from Sigma Aldrich chemical Co., USA or Across Organics or SRL India and were used as received. Ionic liquid butyl methyl imidazolium bromide ([BMIm]Br) was prepared in the laboratory using standard protocol.  $^1\text{H}$  NMR and  $^{13}\text{C}$  NMR spectra were recorded at ambient temperature using Bruker Ascend 400 MHz spectrometers (400 MHz for  $^1\text{H}$  and 100 MHz for  $^{13}\text{C}$ ). Chemical shifts were reported in parts per million from the tetramethyl silane internal reference, and coupling constants were reported in Hertz. Proton multiplicities were represented as s (singlet), d (doublet), dd (double doublet), t (triplet), q (quartet), and m (multiplet). FTIR spectra were recorded on Bruker Alpha FTIR spectrometer on Neat or KBr pellets. Mass spectra (HRMS) were obtained from XEVO G2-XS QTOF (Waters) using 70 eV in positive ion mode. The single-crystal X-ray diffraction (XRD) data were collected on a Bruker D8 Venture system with a microfocus optics using Cu K $\alpha$  radiation. The data were analysed and processed with Bruker Apex III software suite 61 incorporated with multiple tools such as cell\_now and RLATT for the determination of the unit cell, SAINT-plus for data reduction, and SADABS for absorption correction. The structure solutions were performed with SHELXT and the full-matrix least-squares refinements were performed with SHELXL suite of programs incorporated in Olex 2.6. For the optimization of geometry of represented compounds the structures were drawn in Gauss view with Gaussian-09W-Gaussview-6 program to obtain the energy minimized structure. The density functional theory (DFT) with the B3LYP correlation function as basis set of calculations have been employed imposing 6-311G(d,p) as additional constraints. Frequency calculations were carried out with the DFT optimized structures using the same basis set to confirm the correctness of optimization and found no imaginary frequency.

### Experimental procedure for the synthesis of 1a'-e' and 1f-o:

To a mixture of SDS (10 mg, 3.5 mol%), ionic liquid [BMIm]Br (20 mg, 10 mol%), aromatic aldehydes (**2**, 1 mmol), malononitrile (73 mg, 1.1 mmol) in H<sub>2</sub>O (4 mL) were stirred at 80°C until the disappearance of aldehydes (TLC, usually 20-40 min.). Then pyrazolones (**6**, 1 mmol) was added in the reaction mixture and continued heating at the same temperature till the complete consumption of pyrazolones (Table 2). After the completion of reaction as

indicated by TLC, the reaction mixture is cooled to 40°C, the solid obtained was filtered, washed with water and recrystallized from ethanol-water (~1:1) mixture.

### Physical and spectral data 1a'-e' and 1f-o

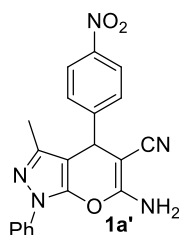

**6-amino-3-methyl-4-(4-nitrophenyl)-1-phenyl-1,4-dihydropyrano[2,3-c]pyrazole-5-carbonitrile (1a')**:<sup>1</sup> Yield: 96% (40 min), white solid, m. p. 198-200 °C (lit. m. p. 197-199 °C); IR (KBr)  $\nu_{\max}$  3320, 3085, 2200, 1675, 1595, 1455, 1335, 1125  $\text{cm}^{-1}$ ; <sup>1</sup>H NMR (400 MHz, DMSO-d<sub>6</sub>)  $\delta$  8.24 (d,  $J$  = 8.0 Hz, 2H), 7.80 (d,  $J$  = 8.0 Hz, 2H), 7.59 (d,  $J$  = 8.0 Hz, 2H), 7.51 (t,  $J$  = 8.0 Hz, 2H), 7.39 (s, 2H), 7.34 (t,  $J$  = 8.0 Hz, 1H), 4.93 (s, 1H), 1.80 (s, 3H); <sup>13</sup>C NMR (100 MHz, DMSO-d<sub>6</sub>)  $\delta$  160.2, 151.7, 147.1, 145.6, 144.5, 137.9, 129.8, 129.7, 126.8, 124.4, 120.6, 120.2, 98.1, 57.4, 36.8, 13.0.

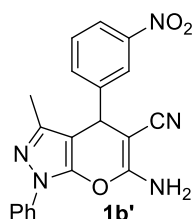

**6-amino-3-methyl-4-(3-nitrophenyl)-1-phenyl-1,4-dihydropyrano[2,3-c]pyrazole-5-carbonitrile (1b')**:<sup>1</sup> Yield: 95% (50 min), white solid, m. p. 192-194 °C (lit. m. p. 191-193 °C); IR (KBr)  $\nu_{\max}$  3320, 3095, 2205, 1675, 1590, 1475, 1335, 1250, 1020  $\text{cm}^{-1}$ ; <sup>1</sup>H NMR (400 MHz, DMSO-d<sub>6</sub>)  $\delta$  8.16 (s, 2H), 7.80 (d,  $J$  = 8.0 Hz, 3H), 7.68 (t,  $J$  = 8.0 Hz, 1H), 7.50 (t,  $J$  = 8.0 Hz, 2H), 7.39-7.32 (m, 3H), 4.98 (s, 1H), 1.80 (s, 3H); <sup>13</sup>C NMR (100 MHz, DMSO-d<sub>6</sub>)  $\delta$  160.2, 148.4, 146.4, 145.6, 144.5, 137.9, 135.2, 130.8, 129.8, 126.8, 122.8, 122.7, 120.6, 120.2, 98.1, 57.6, 36.7, 13.1.

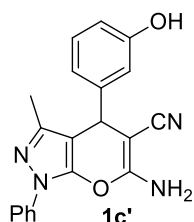

**6-amino-4-(3-hydroxyphenyl)-3-methyl-1-phenyl-1,4-dihydropyrano[2,3-c]pyrazole-5-carbonitrile (1c')**:<sup>2</sup> Yield: 94% (50 min), white solid, m. p. 294-296 °C (lit. m. p. 295-297 °C); IR (KBr)  $\nu_{\max}$  3380, 3310, 2210, 1660, 1410, 1350  $\text{cm}^{-1}$ ; <sup>1</sup>H NMR (400 MHz, DMSO-d<sub>6</sub>)

$\delta$  9.37 (s, 1H), 7.78 (s, 2H), 7.50 (s, 2H), 7.33 (s, 1H), 7.20-7.14 (m, 3H), 6.69-6.62 (m, 3H), 4.59 (s, 1H), 1.83 (s, 3H);  $^{13}\text{C}$  NMR (100 MHz, DMSO- $d_6$ )  $\delta$  159.9, 158.0, 145.8, 145.6, 144.3, 138.0, 129.9, 129.8, 126.6, 120.5, 120.4, 118.9, 114.9, 114.6, 99.2, 58.8, 37.1, 13.1.

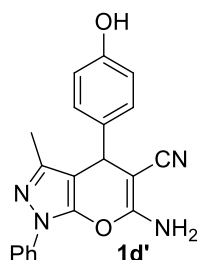

**6-amino-4-(4-hydroxyphenyl)-3-methyl-1-phenyl-1,4-dihydropyrano[2,3-c]pyrazole-5-carbonitrile (1d')**:<sup>1</sup> Yield: 94% (70 min), white solid, m. p. 206-208 °C (lit. m. p. 208-210 °C); IR (KBr)  $\nu_{\text{max}}$  3390, 3310, 2210, 1650, 1405, 1300  $\text{cm}^{-1}$ ;  $^1\text{H}$  NMR (400 MHz, DMSO- $d_6$ )  $\delta$  9.35 (s, 1H), 7.78 (d,  $J = 8.0$  Hz, 2H), 7.49 (s, 2H), 7.32 (s, 1H), 7.14 (s, 2H), 7.04 (d,  $J = 8.0$  Hz, 2H), 6.72 (d,  $J = 8.0$  Hz, 2H), 4.56 (s, 1H), 1.79 (s, 3H);  $^{13}\text{C}$  NMR (100 MHz, DMSO- $d_6$ )  $\delta$  159.7, 156.7, 145.8, 144.2, 138.1, 134.4, 129.8, 129.2, 126.5, 120.6, 120.3, 115.7, 99.5, 59.3, 36.5, 13.1.

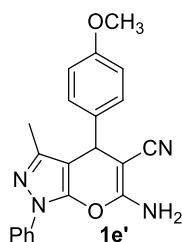

**6-amino-4-(4-methoxyphenyl)-3-methyl-1-phenyl-1,4-dihydropyrano[2,3-c]pyrazole-5-carbonitrile (1e')**:<sup>1</sup> Yield: 95% (70 min), white solid, m. p. 168-170 °C (lit. m. p. 172-174 °C); IR (KBr)  $\nu_{\text{max}}$  3380, 3310, 2990, 2205, 1670, 1445, 1225, 1105, 1015  $\text{cm}^{-1}$ ;  $^1\text{H}$  NMR (400 MHz, DMSO- $d_6$ )  $\delta$  7.79 (d,  $J = 8.0$  Hz, 2H), 7.49 (t,  $J = 8.0$  Hz, 2H), 7.32 (t,  $J = 8.0$  Hz, 1H), 7.17 (d,  $J = 8.0$  Hz, 4H), 6.90 (d,  $J = 8.0$  Hz, 2H), 4.63 (s, 1H), 3.75 (s, 3H), 1.79 (s, 3H);  $^{13}\text{C}$  NMR (100 MHz, DMSO- $d_6$ )  $\delta$  159.7, 158.6, 145.8, 144.3, 138.0, 136.1, 129.8, 129.3, 126.6, 120.5, 120.4, 114.3, 99.3, 59.0, 55.5, 36.4, 13.1.

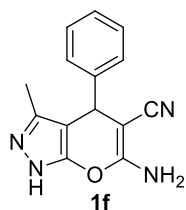

**6-amino-3-methyl-4-phenyl-2,4-dihydropyrano[2,3-c]pyrazole-5-carbonitrile (1f)**:<sup>3</sup> Yield: 78%, white solid, m. p. 262-264 °C; lit. m. p. 258-259 °C; IR (KBr)  $\nu_{\text{max}}$  3374, 3311,

3172, 2193, 1045  $\text{cm}^{-1}$ ;  $^1\text{H}$  NMR (400 MHz, DMSO- $d_6$ )  $\delta$  12.10 (s, 1H), 7.32 (t,  $J = 8.0$  Hz, 2H), 7.23 (t,  $J = 8.0$  Hz, 1H), 7.17 (d,  $J = 8.0$  Hz, 2H), 6.88 (s, 2H), 4.60 (s, 1H), 1.79 (s, 3H);  $^{13}\text{C}$  NMR (100 MHz, DMSO- $d_6$ )  $\delta$  161.3, 155.2, 144.9, 136.0, 128.9, 127.9, 127.2, 121.2, 98.1, 57.7, 36.7, 10.2.

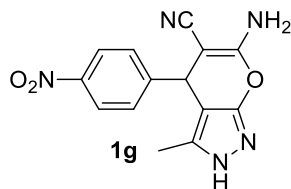

**6-amino-3-methyl-4-(4-nitrophenyl)-2,4-dihydropyrano[2,3-c]pyrazole-5-carbonitrile (1g):**<sup>3</sup> Yield: 96% (40 min), white solid, m. p. 250-252  $^\circ\text{C}$  (lit. m. p. 251-253  $^\circ\text{C}$ ); IR (KBr)  $\nu_{\text{max}}$  3425, 3231, 2925, 2192, 1644, 1403  $\text{cm}^{-1}$ ;  $^1\text{H}$  NMR (400 MHz, DMSO- $d_6$ )  $\delta$  12.21 (s, 1H), 8.21 (d,  $J = 8.0$  Hz, 2H), 7.47 (d,  $J = 8.0$  Hz, 2H), 7.07 (s, 2H), 4.84 (s, 1H), 1.81 (s, 3H);  $^{13}\text{C}$  NMR (100 MHz, DMSO- $d_6$ )  $\delta$  161.6, 155.1, 152.6, 146.8, 136.3, 129.3, 124.4, 121.0, 97.0, 56.3, 36.3, 10.2.

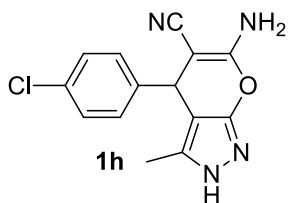

**6-amino-4-(4-chlorophenyl)-3-methyl-2,4-dihydropyrano[2,3-c]pyrazole-5-carbonitrile (1h):**<sup>3</sup> Yield: 94% (50 min), white solid, m. p. 232-234  $^\circ\text{C}$  (lit. m. p. 234-236  $^\circ\text{C}$ ); IR (KBr)  $\nu_{\text{max}}$  3408, 3369, 3307, 2188, 1643  $\text{cm}^{-1}$ ;  $^1\text{H}$  NMR (400 MHz, DMSO- $d_6$ )  $\delta$  12.15 (s, 1H), 7.38 (d,  $J = 8.0$  Hz, 2H), 7.20 (d,  $J = 8.0$  Hz, 2H), 6.94 (s, 2H), 4.64 (s, 1H), 1.80 (s, 3H);  $^{13}\text{C}$  NMR (100 MHz, DMSO- $d_6$ )  $\delta$  161.4, 155.2, 144.0, 136.1, 131.7, 129.8, 128.9, 121.1, 97.7, 57.2, 36.0, 10.2.

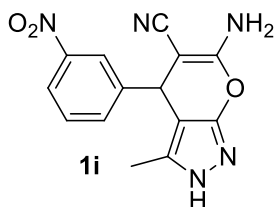

**6-amino-3-methyl-4-(3-nitrophenyl)-2,4-dihydropyrano[2,3-c]pyrazole-5-carbonitrile (1i):**<sup>4</sup> Yield: 94% (50 min), white solid, m. p. 210-212  $^\circ\text{C}$  (lit. m. p. 214-216  $^\circ\text{C}$ ); IR (KBr)  $\nu_{\text{max}}$  3445, 3230, 2930, 2194, 1602, 1408  $\text{cm}^{-1}$ ;  $^1\text{H}$  NMR (400 MHz, DMSO- $d_6$ )  $\delta$  12.22 (s, 1H), 8.13 (d,  $J = 8.0$  Hz, 1H), 8.03 (s, 1H), 7.69-7.63 (m, 2H), 7.07 (s, 2H), 4.89 (s, 1H), 1.81

(s, 3H);  $^{13}\text{C}$  NMR (100 MHz, DMSO- $d_6$ )  $\delta$  161.6, 155.2, 148.3, 147.3, 136.4, 134.9, 130.7, 122.5, 122.3, 121.0, 97.1, 56.6, 36.1, 10.2.

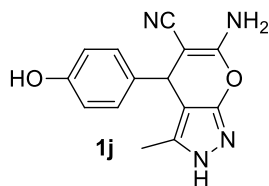

**6-amino-4-(4-hydroxyphenyl)-3-methyl-2,4-dihydropyrano[2,3-c]pyrazole-5-**

**carbonitrile (1j):**<sup>3</sup> Yield: 94%, white solid, m. p. 224-226 °C (lit. m. p. 222-224 °C); IR (KBr)  $\nu_{\text{max}}$  3425, 3231, 2925, 2192, 1644, 1403  $\text{cm}^{-1}$ ;  $^1\text{H}$  NMR (400 MHz, DMSO- $d_6$ )  $\delta$  12.05 (s, 1H), 9.29 (s, 1H), 6.95 (d,  $J = 8.0$  Hz, 2H), 6.80 (s, 2H), 6.69 (d,  $J = 8.0$  Hz, 2H), 4.47 (s, 1H), 1.79 (s, 3H);  $^{13}\text{C}$  NMR (100 MHz, DMSO- $d_6$ )  $\delta$  161.1, 156.5, 155.2, 136.0, 135.2, 129.0, 121.4, 115.6, 98.5, 58.2, 36.0, 10.2.

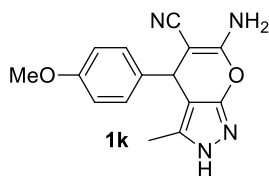

**6-amino-4-(4-methoxyphenyl)-3-methyl-2,4-dihydropyrano[2,3-c]pyrazole-5-**

**carbonitrile (1k):**<sup>3</sup> Yield: 94% (70 min), white solid, m. p. 206-208 °C (lit. m. p. 210-212 °C); IR (KBr)  $\nu_{\text{max}}$  3420, 3249, 2899, 2201, 1644  $\text{cm}^{-1}$ ;  $^1\text{H}$  NMR (400 MHz, DMSO- $d_6$ )  $\delta$  12.09 (s, 1H), 7.08 (d,  $J = 8.0$  Hz, 2H), 6.88-6.84 (m, 4H), 4.54 (s, 1H), 3.73 (s, 3H), 1.79 (s, 3H);  $^{13}\text{C}$  NMR (100 MHz, DMSO- $d_6$ )  $\delta$  161.1, 158.4, 155.2, 136.9, 136.0, 129.0, 121.3, 114.2, 98.3, 58.0, 55.4, 35.9, 10.2.

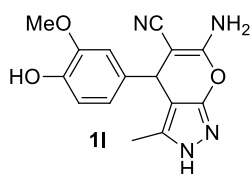

**6-amino-4-(4-hydroxy-3-methoxyphenyl)-3-methyl-2,4-dihydropyrano[2,3-c]pyrazole-5-**

**carbonitrile (1l):**<sup>3</sup> Yield: 93% (60 min), white solid, m. p. 230-232 °C (lit. m. p. 234-236 °C); IR (KBr)  $\nu_{\text{max}}$  3435, 3257, 2887, 2201, 1621, 1407  $\text{cm}^{-1}$ ;  $^1\text{H}$  NMR (400 MHz, DMSO- $d_6$ )  $\delta$  12.06 (s, 1H), 8.86 (s, 1H), 6.81 (s, 2H), 6.73-6.70 (m, 2H), 6.55 (d,  $J = 8.0$  Hz, 1H), 4.50 (s, 1H), 3.71 (s, 3H) 1.82 (s, 3H);  $^{13}\text{C}$  NMR (100 MHz, DMSO- $d_6$ )  $\delta$  161.1, 155.2, 147.8, 145.7, 136.0, 135.8, 121.4, 120.2, 115.9, 112.1, 98.4, 58.1, 56.1, 36.3, 10.3.

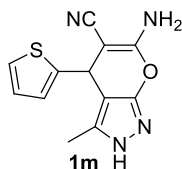

**6-amino-3-methyl-4-(thiophen-2-yl)-2,4-dihydropyrano[2,3-c]pyrazole-5-carbonitrile**

**(1m)**<sup>4</sup>: Yield: 92% (120 min), yellowish white solid, m. p. 220-222 °C (lit. m. p. 222-22 °C); IR (KBr)  $\nu_{\max}$  3365, 3102, 2881, 2282, 1560, 1370, 1220, 1135, 1106, 783  $\text{cm}^{-1}$ ; <sup>1</sup>H NMR (400 MHz, DMSO-*d*<sub>6</sub>)  $\delta$  12.18 (s, 1H), 7.38 (d, *J* = 4.0 Hz, 1H), 7.01 (d, *J* = 4.0 Hz, 1H), 6.94 (d, *J* = 8.0 Hz, 3H), 5.00 (s, 1H), 1.92 (s, 3H); <sup>13</sup>C NMR (100 MHz, DMSO-*d*<sub>6</sub>)  $\delta$  161.1, 154.8, 150.2, 136.5, 127.0, 125.4, 124.8, 121.1, 98.0, 58.1, 31.9, 10.2.

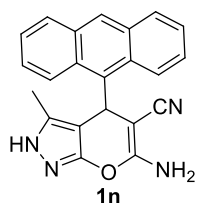

**6-amino-4-(anthracen-9-yl)-3-methyl-2,4-dihydropyrano[2,3-c]pyrazole-5-carbonitrile**

**(1n)**: Yield: 87% (720 min), yellowish solid, m. p. 190-192 °C; IR (KBr)  $\nu_{\max}$  3394, 3297, 3171, 2888, 2188, 1719, 1636, 1541, 1391, 1155, 1046, 1012, 878, 832, 775, 716  $\text{cm}^{-1}$ ; <sup>1</sup>H NMR (400 MHz, DMSO-*d*<sub>6</sub>)  $\delta$  12.02 (s, 1H), 8.71 (d, *J* = 8.0 Hz, 1H), 8.70 (s, 1H), 8.15-8.05 (m, 3H), 7.61-7.54 (m, 2H), 7.44 (t, *J* = 8.0 Hz, 1H), 7.34 (t, *J* = 8.0 Hz, 1H), 6.96 (s, 2H), 6.40 (s, 1H), 1.19 (d, *J* = 8.0 Hz, 3H); <sup>13</sup>C NMR (100 MHz, DMSO-*d*<sub>6</sub>)  $\delta$  161.1, 155.1, 135.7, 133.4, 132.1, 131.2, 131.1, 130.1, 129.8, 129.5, 128.4, 127.1, 125.5, 125.1, 124.5, 124.0, 120.8, 99.1, 58.1, 29.8, 9.8; HRMS calcd. for (C<sub>22</sub>H<sub>16</sub>N<sub>4</sub>O +H<sup>+</sup>) 353.1402 found 353.1402.

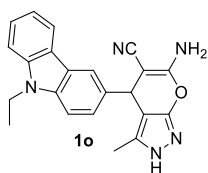

**6-amino-4-(9-ethyl-9H-carbazol-3-yl)-3-methyl-2,4-dihydropyrano[2,3-c]pyrazole-5-**

**carbonitrile (1o)**: Yield: 85% (720 min), yellowish white solid, m. p. 200-202 °C; IR (KBr)  $\nu_{\max}$  3352, 3177, 2970, 2192, 1652, 1600, 1482, 1392, 1332, 1223, 1150, 1103, 1039, 752  $\text{cm}^{-1}$ ; <sup>1</sup>H NMR (400 MHz, DMSO-*d*<sub>6</sub>)  $\delta$  12.08 (s, 1H), 8.14 (d, *J* = 8.0 Hz, 1H), 7.98 (s, 1H), 7.59-7.53 (m, 2H), 7.44 (t, *J* = 8.0 Hz, 1H), 7.24 (d, *J* = 8.0 Hz, 1H), 7.17 (t, *J* = 8.0 Hz, 1H), 6.86 (s, 2H), 4.77 (s, 1H), 4.41 (d, *J* = 8.0 Hz, 2H), 1.76 (s, 3H), 1.32 (t, *J* = 8.0 Hz, 3H); <sup>13</sup>C NMR (100 MHz, DMSO-*d*<sub>6</sub>)  $\delta$  161.1, 155.2, 140.3, 139.0, 136.1, 135.6, 126.1, 126.0, 122.5, 122.3, 121.5, 120.8, 119.5, 119.1, 109.6, 109.5, 98.9, 58.7, 37.5, 36.9, 14.3, 10.3. HRMS calcd (C<sub>22</sub>H<sub>19</sub>N<sub>5</sub>O+H<sup>+</sup>) 370.1668 found 370.1668.

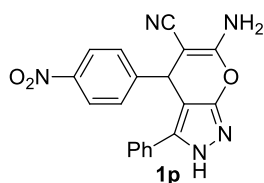

**6-amino-4-(4-nitrophenyl)-3-phenyl-2,4-dihydropyrano[2,3-c]pyrazole-5-carbonitrile**

**(1p):**<sup>5</sup> Yield: 95% (60 min), yellowish white solid, m. p. 222-224 °C (lit. m. p. 224-226 °C); IR (KBr)  $\nu_{\max}$  3438, 3286, 3122, 2871, 2186, 1646, 1597, 1515, 1419, 1351, 1066, 977, 768  $\text{cm}^{-1}$ ;  $^1\text{H}$  NMR (400 MHz, DMSO- $d_6$ )  $\delta$  13.01 (s, 1H), 8.08 (d,  $J = 8.0$  Hz, 2H), 7.47 (d,  $J = 8.0$  Hz, 2H), 7.40 (d,  $J = 8.0$  Hz, 2H), 7.33-7.26 (m, 3H), 7.12 (s, 2H), 5.28 (s, 1H);  $^{13}\text{C}$  NMR (100 MHz, DMSO- $d_6$ )  $\delta$  160.8, 156.3, 152.5, 146.7, 138.7, 129.2, 129.1, 129.0, 128.8, 126.7, 124.1, 120.7, 96.8, 57.4, 36.7.

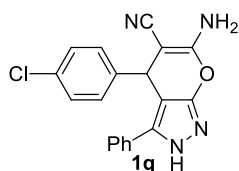

**6-amino-4-(4-chlorophenyl)-3-phenyl-2,4-dihydropyrano[2,3-c]pyrazole-5-carbonitrile**

**(1q):**<sup>6</sup> Yield: 94% (60 min), white solid, m. p. 252-254 °C (lit. m. p. 254-256 °C); IR (KBr)  $\nu_{\max}$  3435, 3290, 3139, 3065, 2189, 1643, 1597, 1493, 1409, 1218, 1093, 978, 767  $\text{cm}^{-1}$ ;  $^1\text{H}$  NMR (400 MHz, DMSO- $d_6$ )  $\delta$  12.94 (s, 1H), 7.46 (d,  $J = 8.0$  Hz, 2H), 7.34-7.25 (m, 5H), 7.13 (d,  $J = 8.0$  Hz, 2H), 7.01 (s, 2H); 5.07 (s, 1H);  $^{13}\text{C}$  NMR (100 MHz, DMSO- $d_6$ )  $\delta$  160.6, 156.4, 144.0, 138.5, 131.6, 129.7, 129.1, 128.9, 128.8, 128.7, 126.7, 121.0, 97.4, 58.2, 36.5.

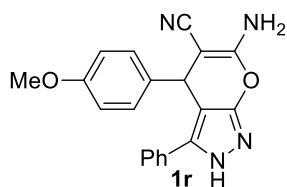

**6-amino-4-(4-methoxyphenyl)-3-phenyl-2,4-dihydropyrano[2,3-c]pyrazole-5-**

**carbonitrile (1r):**<sup>5</sup> Yield: 93% (80 min), yellowish white solid, m. p. 220-222 °C (lit. m. p. 225-227 °C); IR (KBr)  $\nu_{\max}$  3411, 3302, 3282, 2192, 1639, 1509, 1449, 1408, 1259, 1170, 1063, 1031  $\text{cm}^{-1}$ ;  $^1\text{H}$  NMR (400 MHz, DMSO- $d_6$ )  $\delta$  12.89 (s, 1H), 7.46 (d,  $J = 8.0$  Hz, 2H), 7.31-7.26 (m, 3H), 7.02 (d,  $J = 8.0$  Hz, 2H), 6.90 (s, 1H), 6.76 (d,  $J = 8.0$  Hz, 2H), 4.94 (s, 1H), 3.66 (s, 3H);  $^{13}\text{C}$  NMR (100 MHz, DMSO- $d_6$ )  $\delta$  160.3, 158.3, 156.5, 138.2, 137.3, 129.1, 129.0, 128.8, 128.7, 126.6, 121.1, 114.1, 98.1, 59.2, 55.4, 36.5.



$^1\text{H}$  NMR of **1a'** (400 MHz, DMSO- $d_6$ )

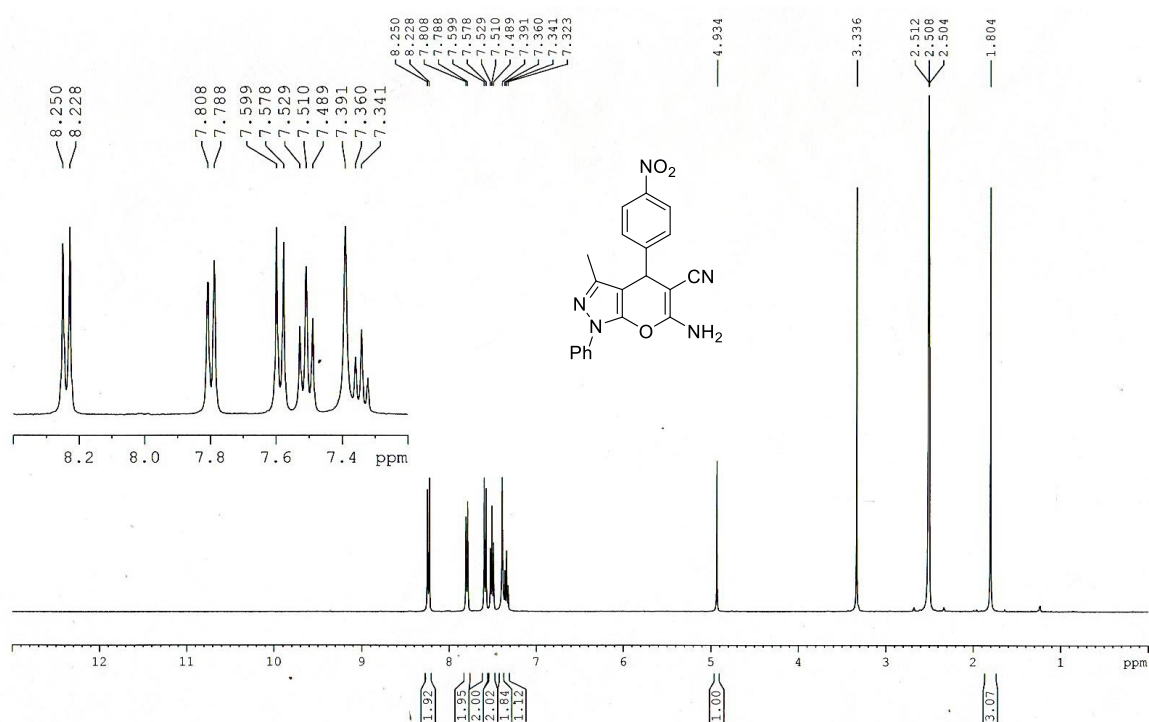

$^{13}\text{C}$  NMR of **1a'** (100 MHz, DMSO- $d_6$ )

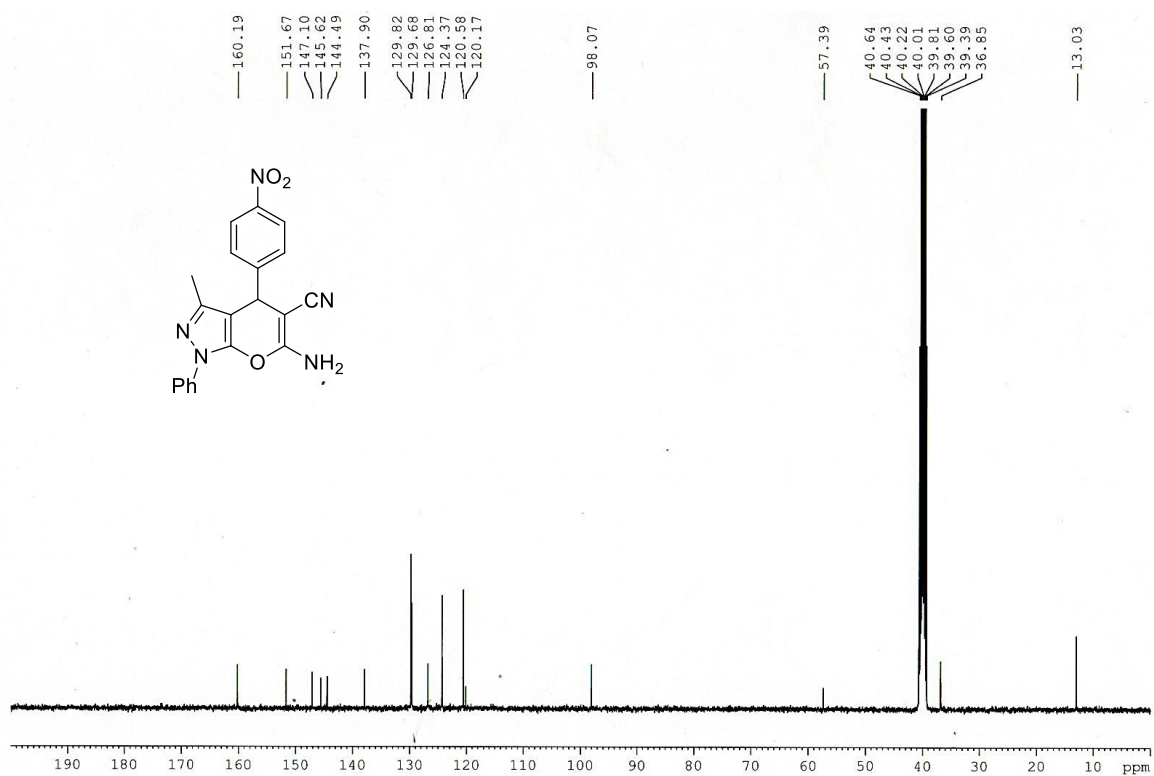

$^1\text{H}$  NMR of **1b'** (400 MHz, DMSO- $d_6$ )

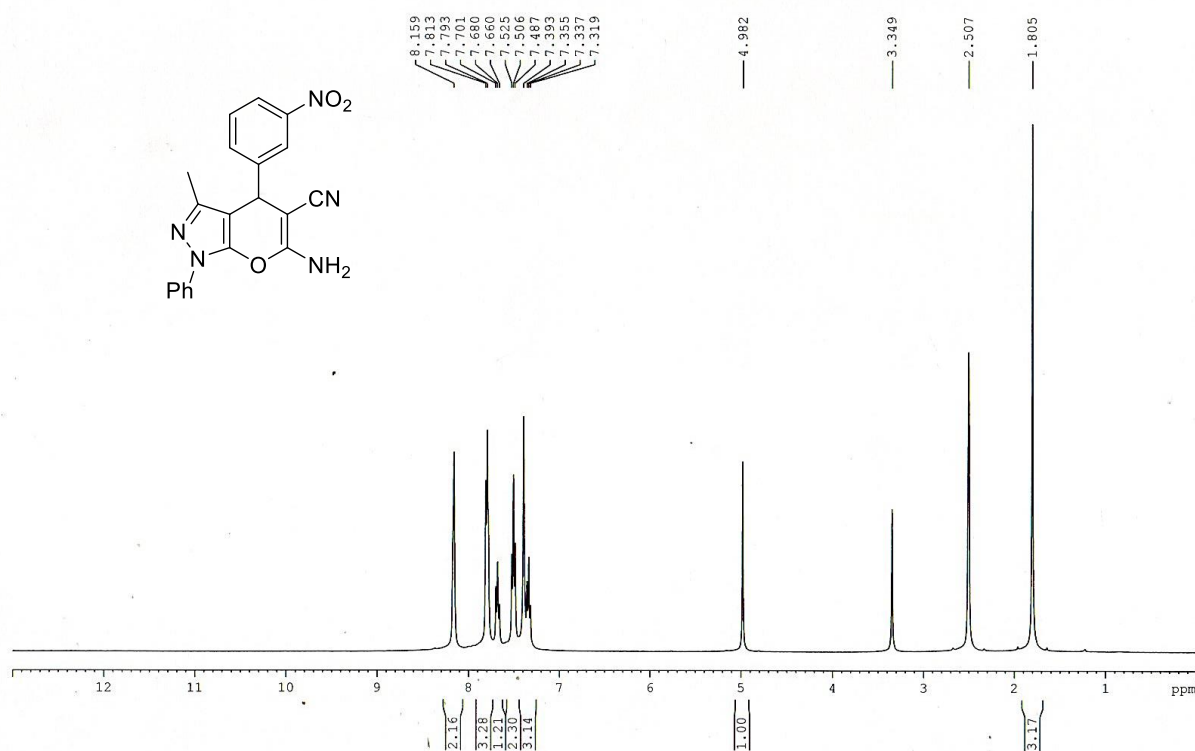

$^{13}\text{C}$  NMR of **1b'** (100 MHz, DMSO- $d_6$ )

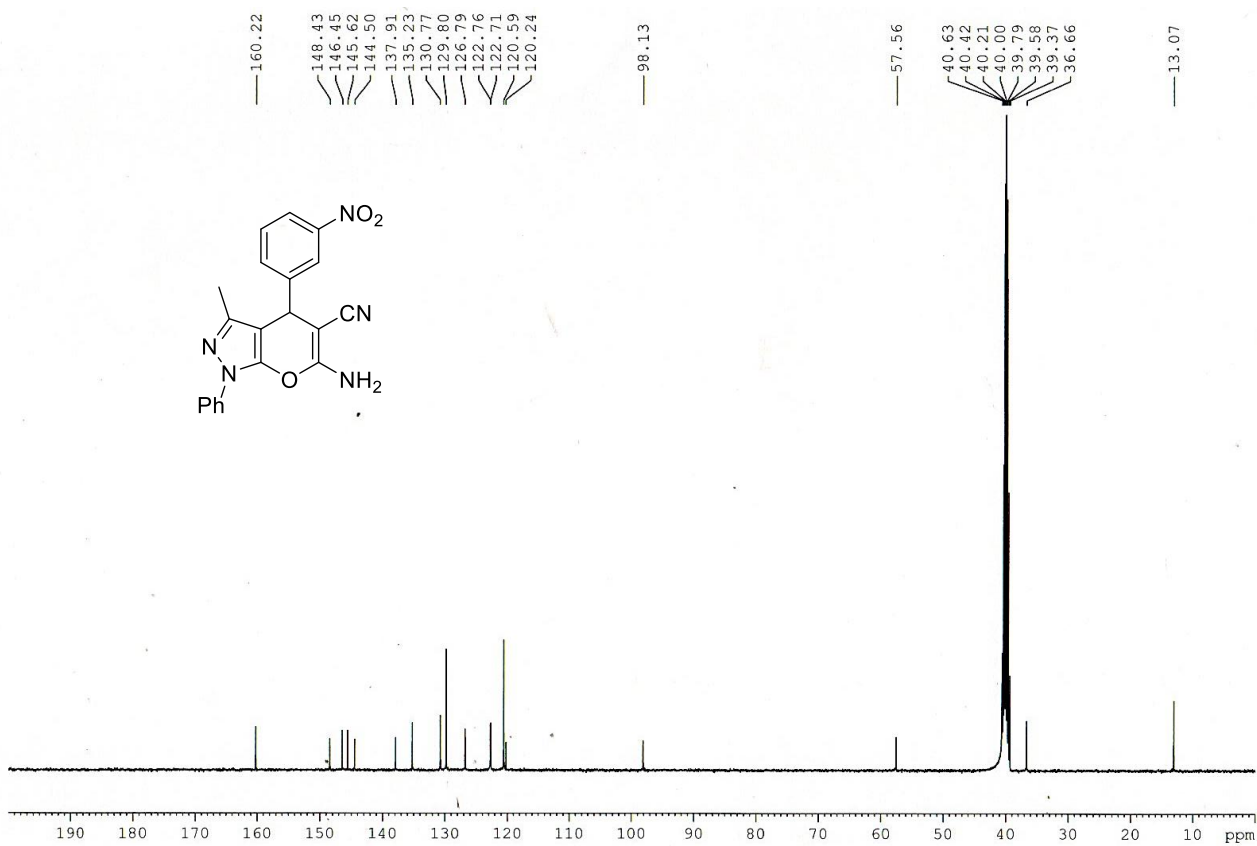

<sup>1</sup>H NMR of **1c'** (400 MHz, DMSO-d<sub>6</sub>)

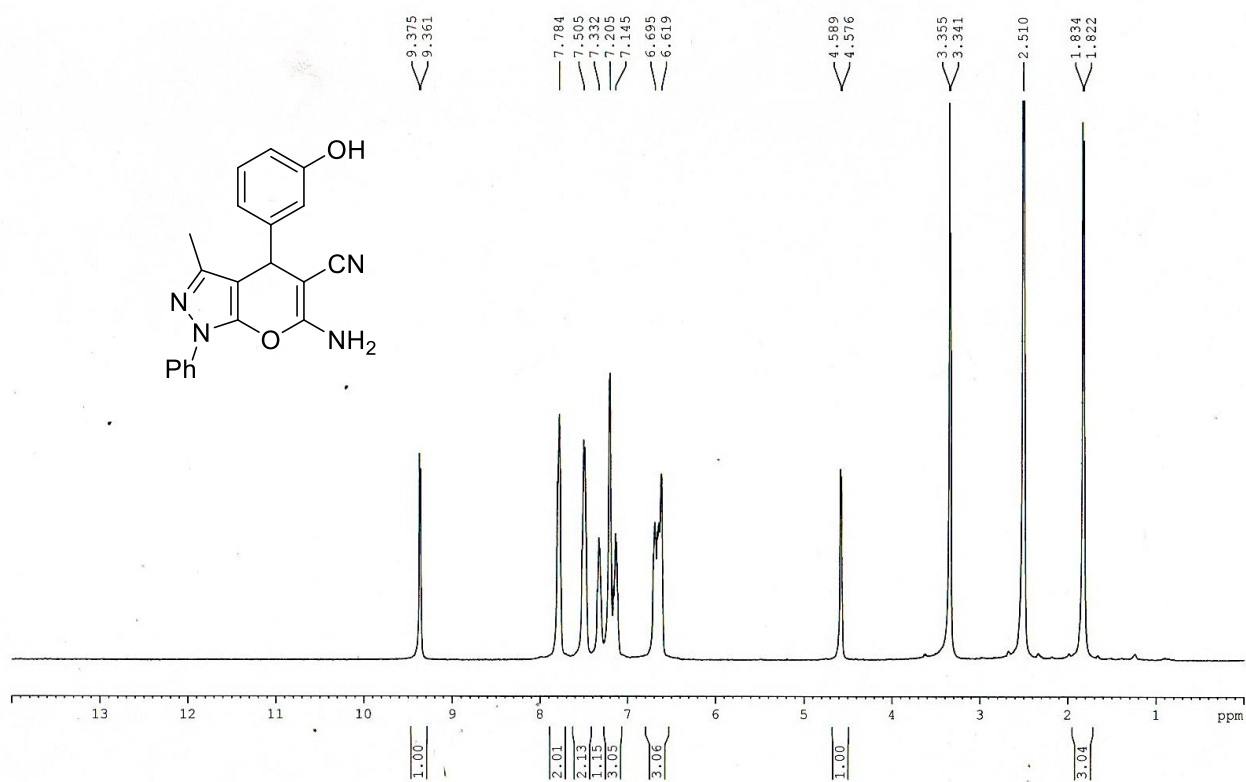

<sup>13</sup>C NMR of **1c'** (100 MHz, DMSO-d<sub>6</sub>)

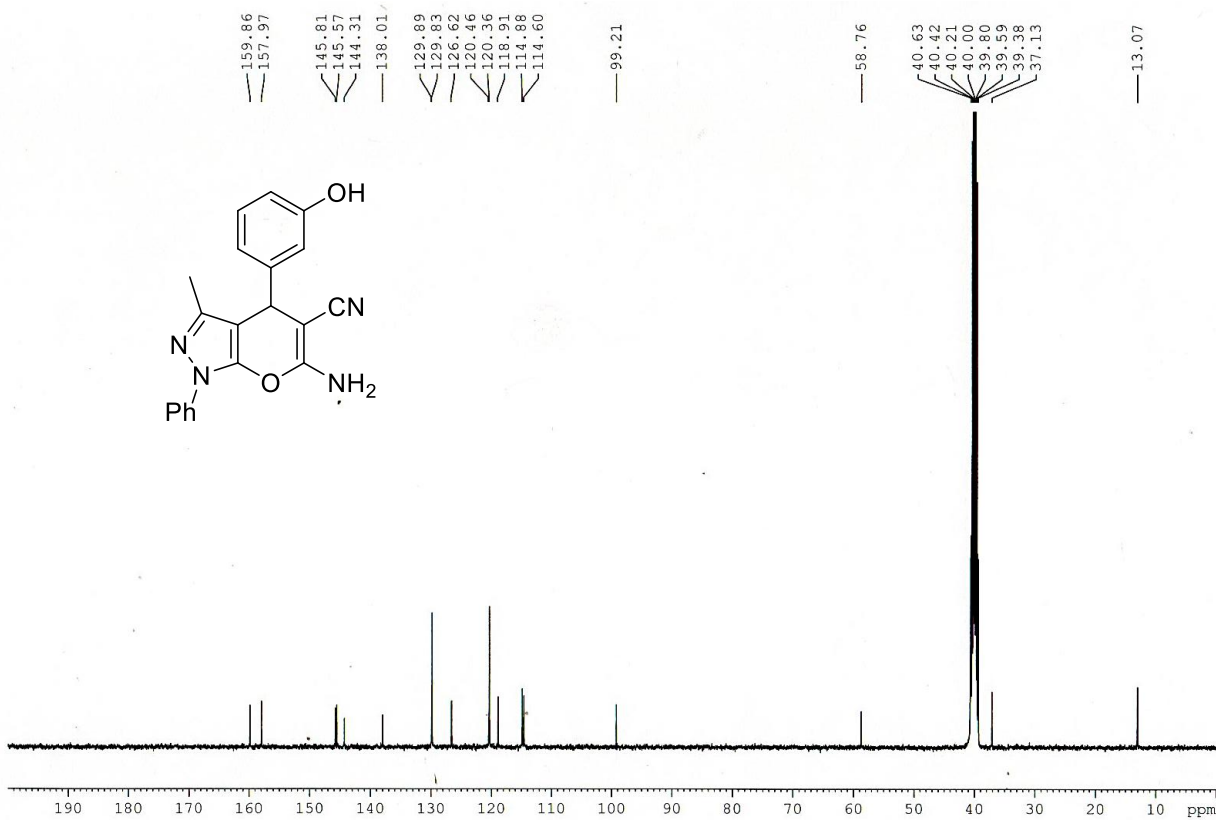

$^1\text{H}$  NMR of **1d'** (400 MHz, DMSO- $d_6$ )

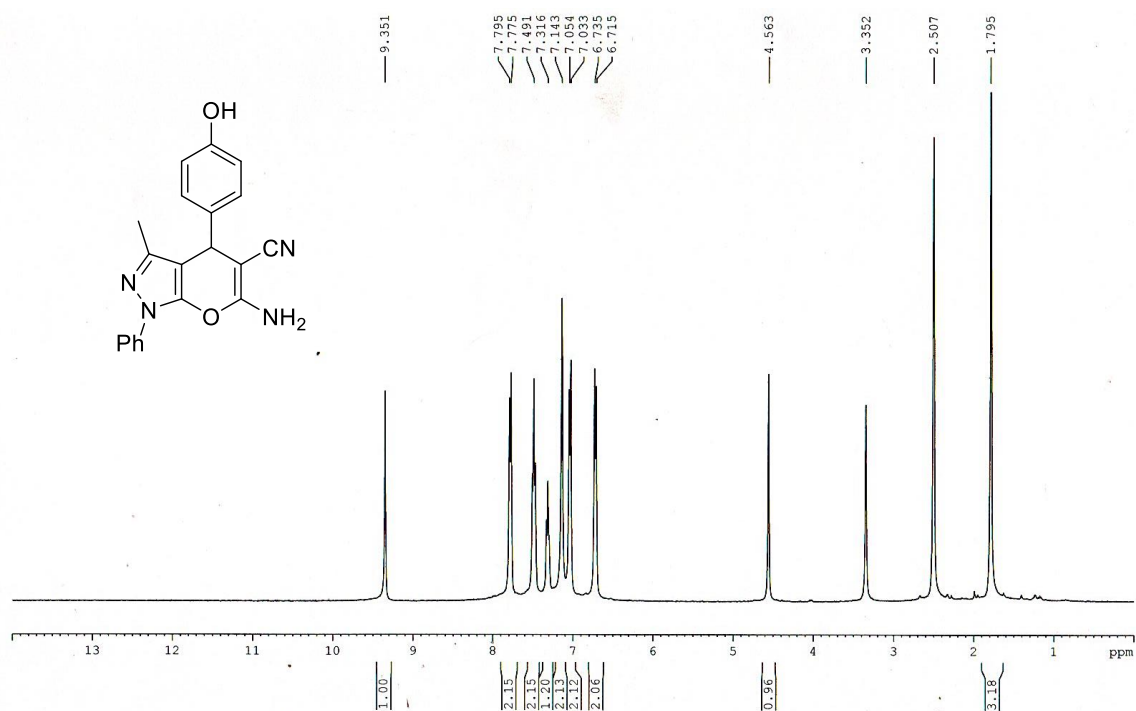

$^{13}\text{C}$  NMR of **1d'** (100 MHz, DMSO- $d_6$ )

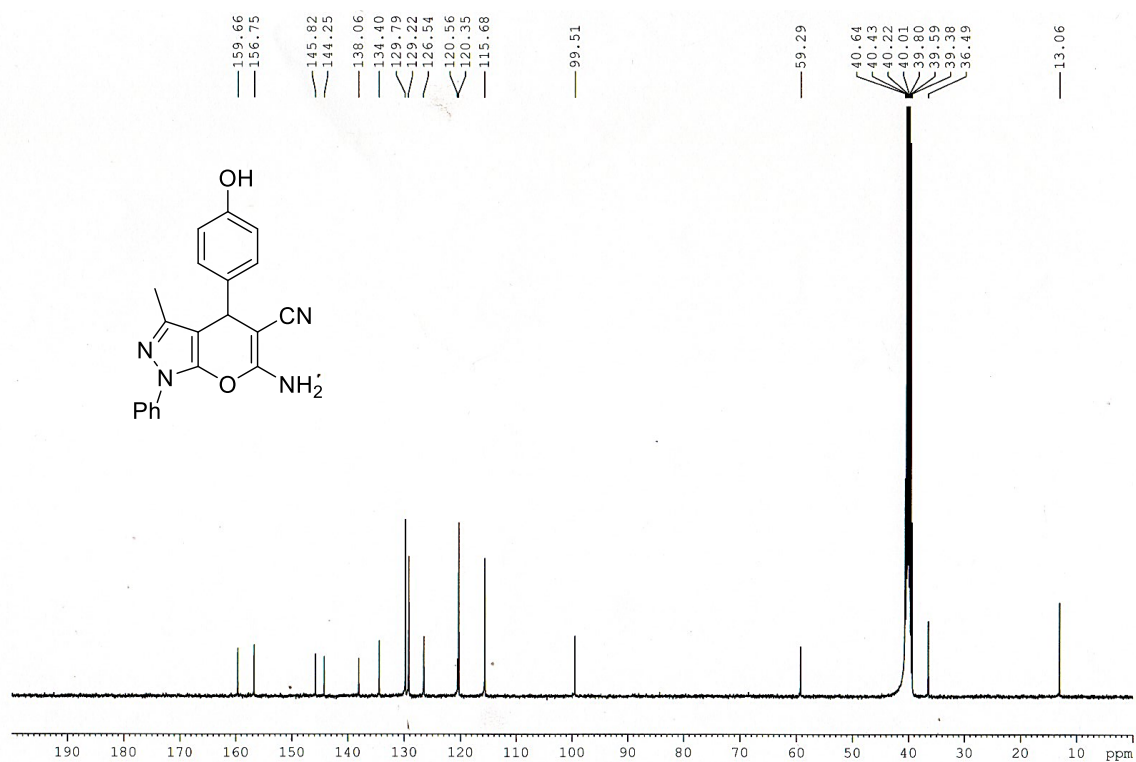

$^1\text{H}$  NMR of **1e'** (400 MHz, DMSO- $d_6$ )

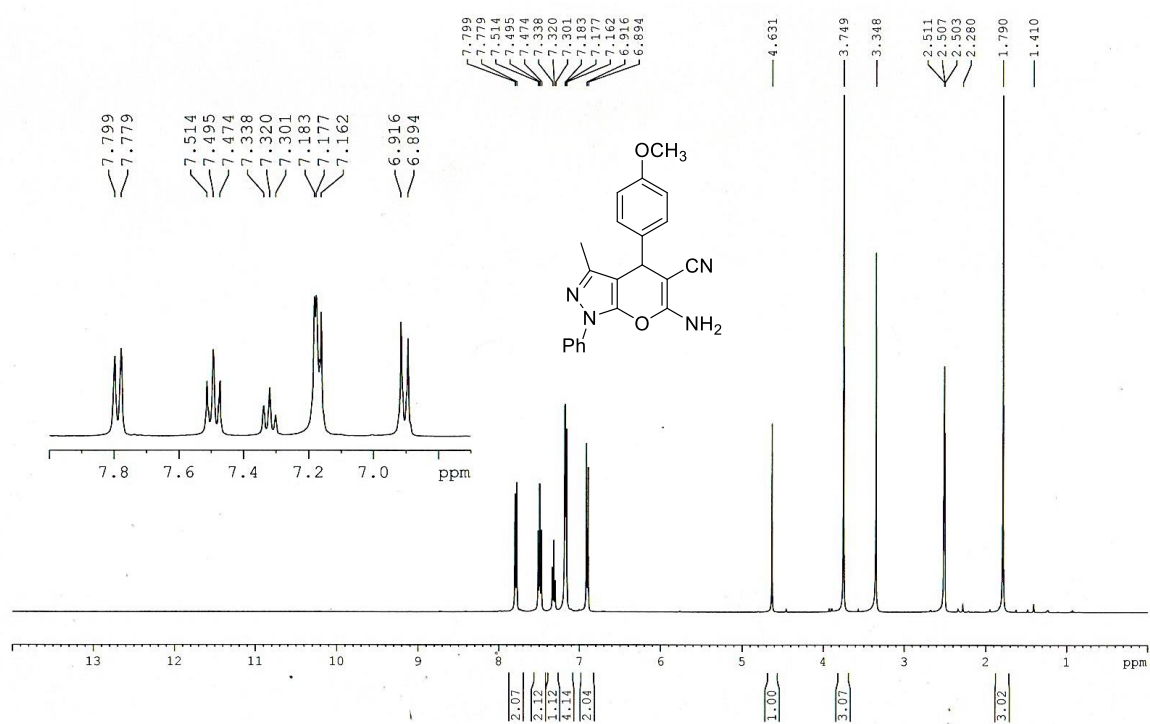

$^{13}\text{C}$  NMR of **1e'** (100 MHz, DMSO- $d_6$ )

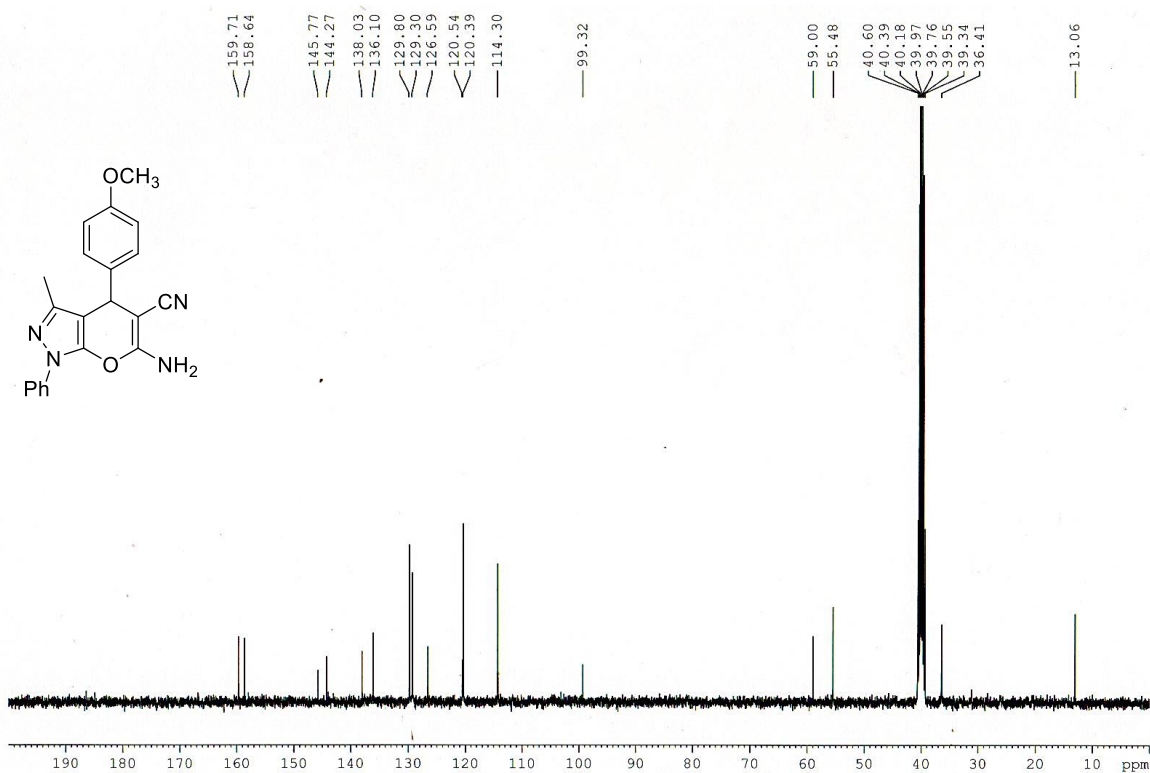

$^1\text{H}$  NMR of **1f** (400 MHz, DMSO- $d_6$ )

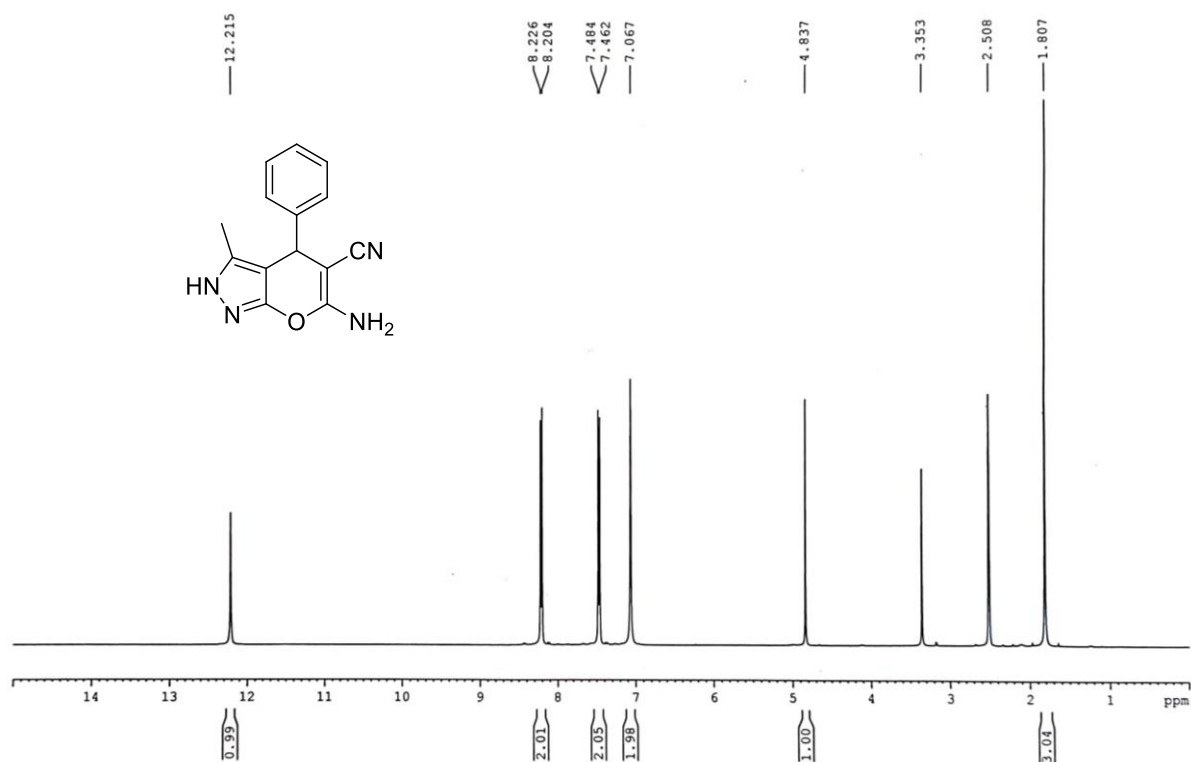

$^{13}\text{C}$  NMR of **1f** (100 MHz, DMSO- $d_6$ )

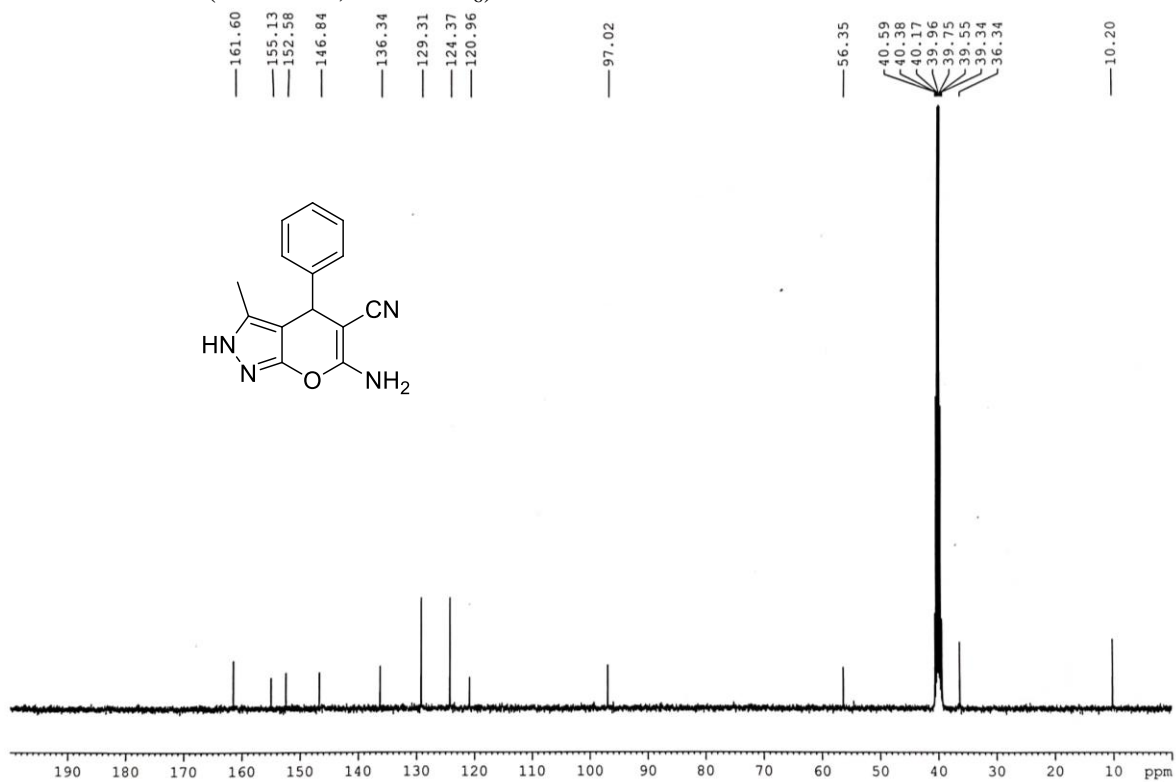

$^1\text{H}$  NMR of **1g** (400 MHz, DMSO- $d_6$ )

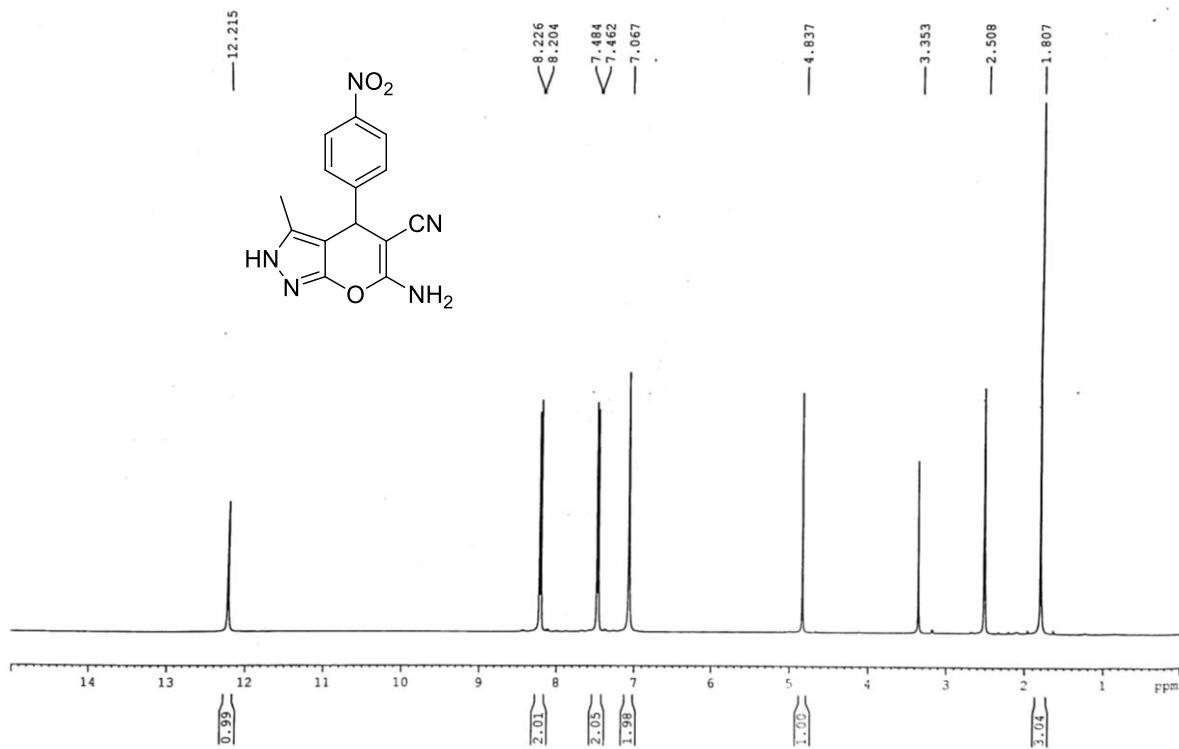

$^{13}\text{C}$  NMR of **1g** (100 MHz, DMSO- $d_6$ )

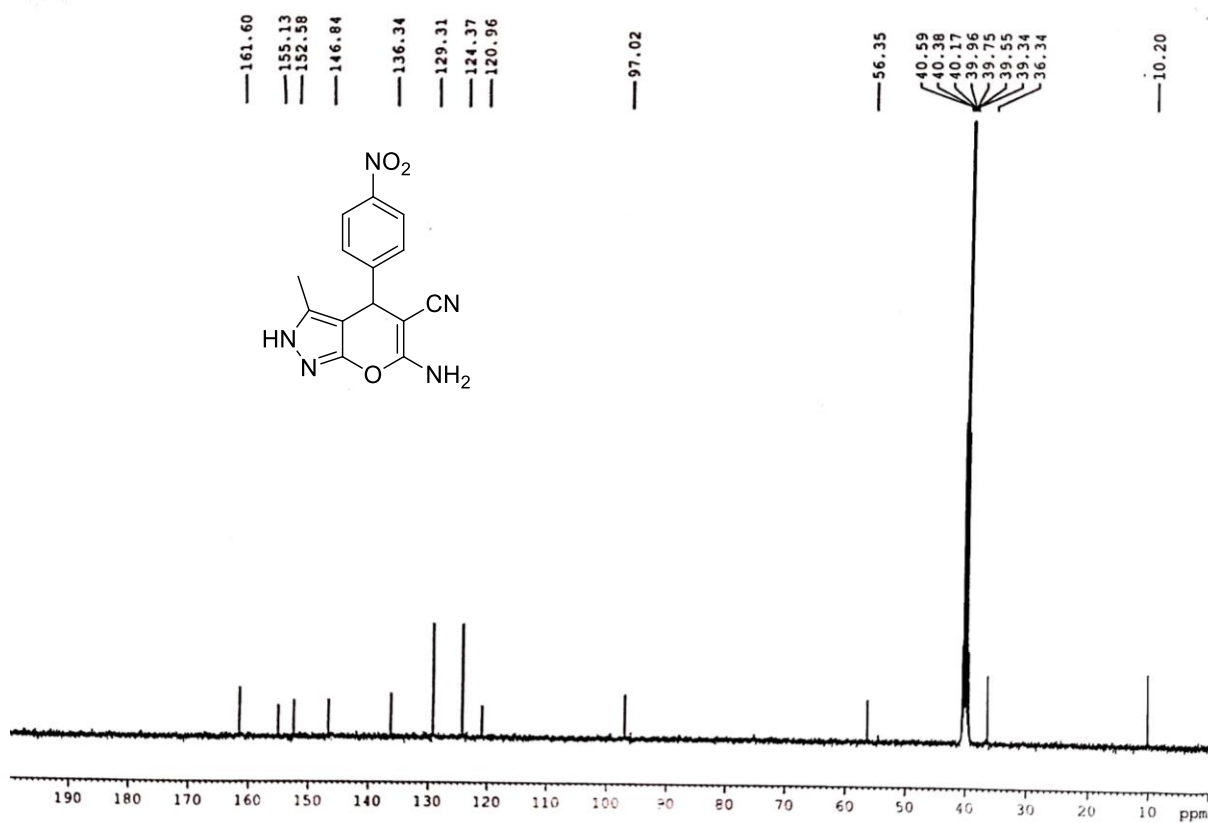

$^1\text{H}$  NMR of **1h** (400 MHz, DMSO- $d_6$ )

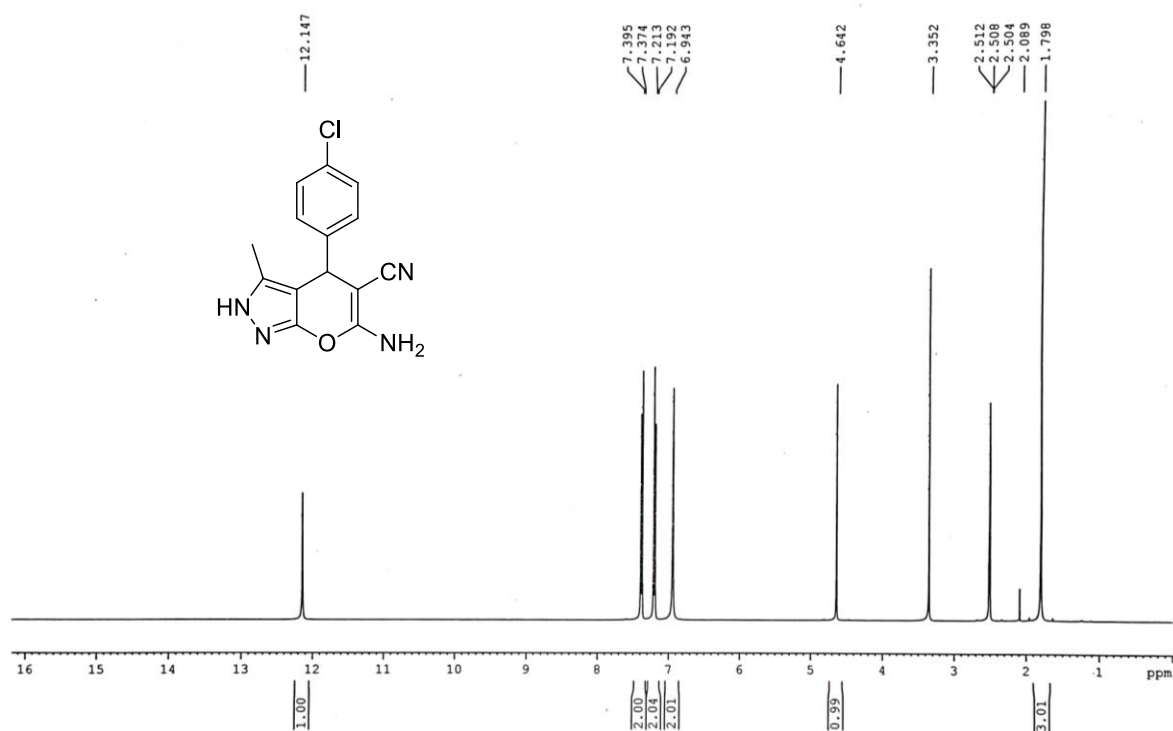

$^{13}\text{C}$  NMR of **1h** (100 MHz, DMSO- $d_6$ )

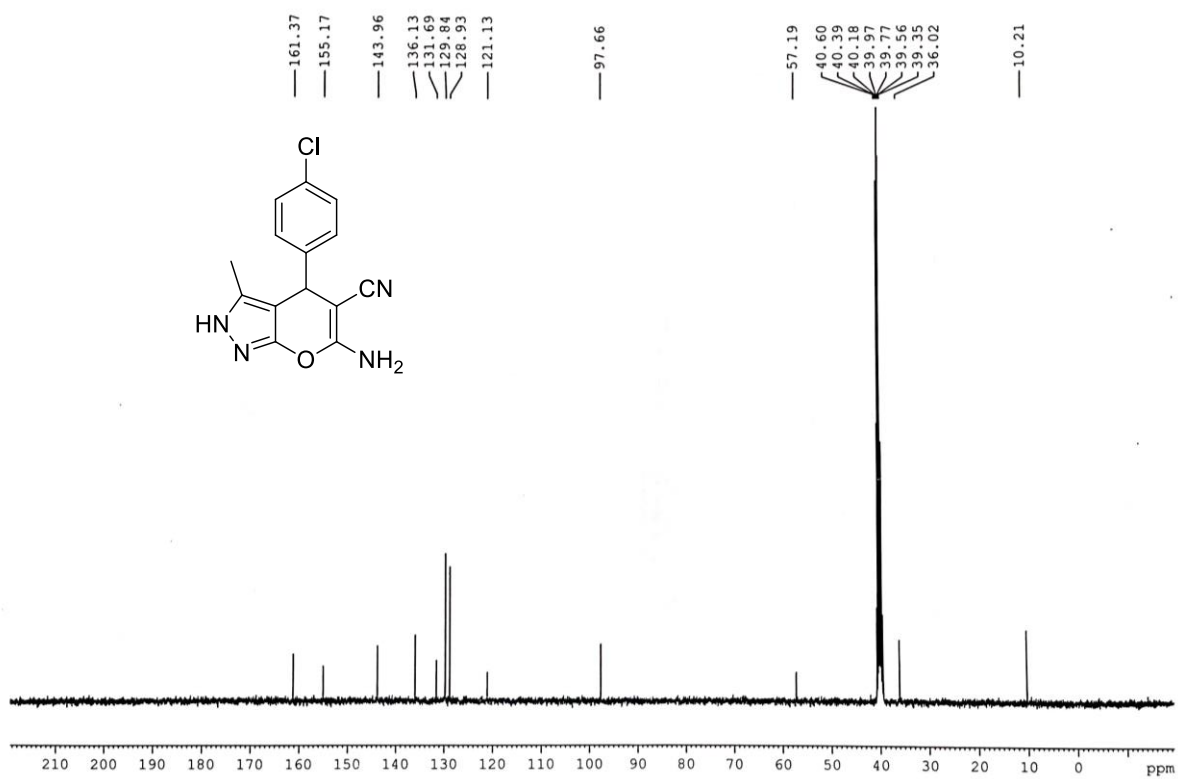



$^1\text{H}$  NMR of **1i** (400 MHz, DMSO- $d_6$ )

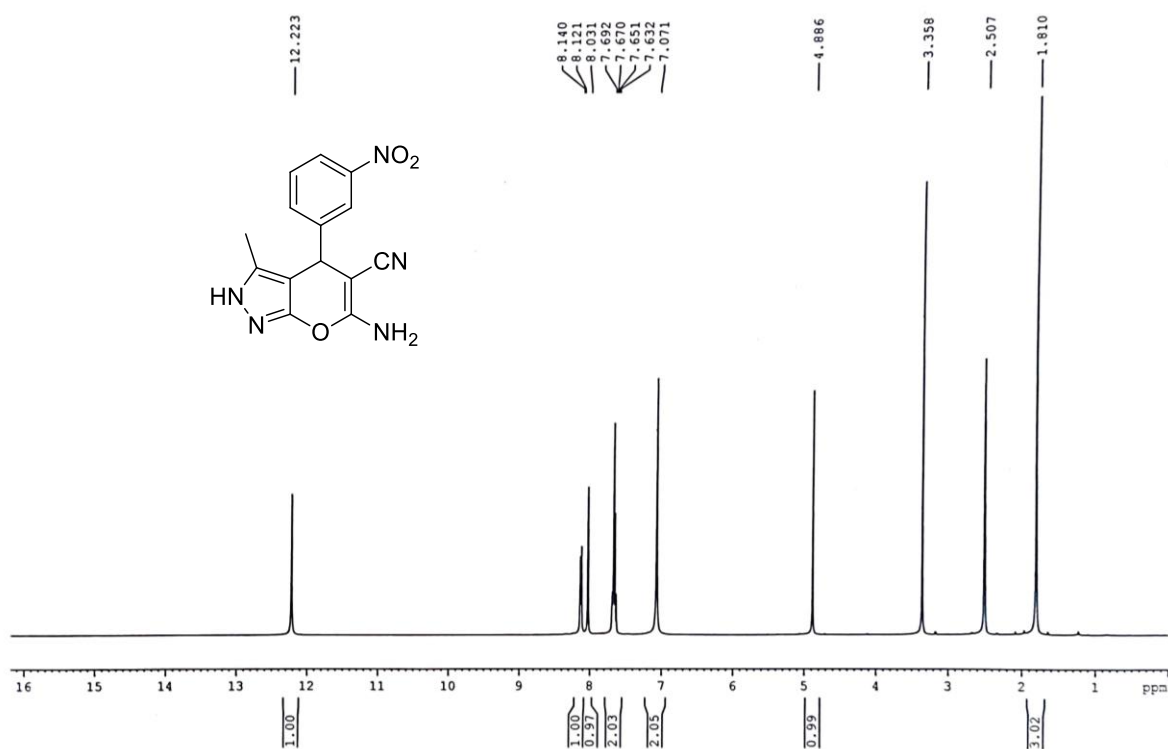

$^{13}\text{C}$  NMR of **1i** (100 MHz, DMSO- $d_6$ )

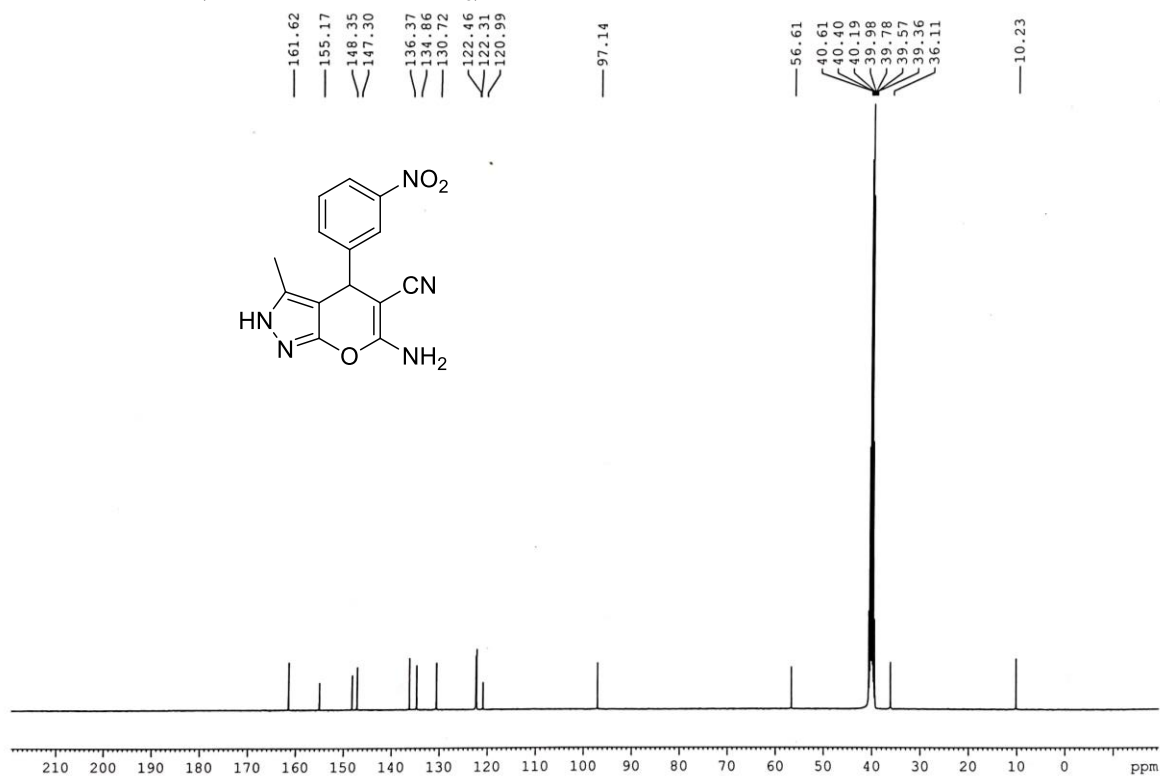

$^1\text{H}$  NMR of **1j** (400 MHz, DMSO- $d_6$ )

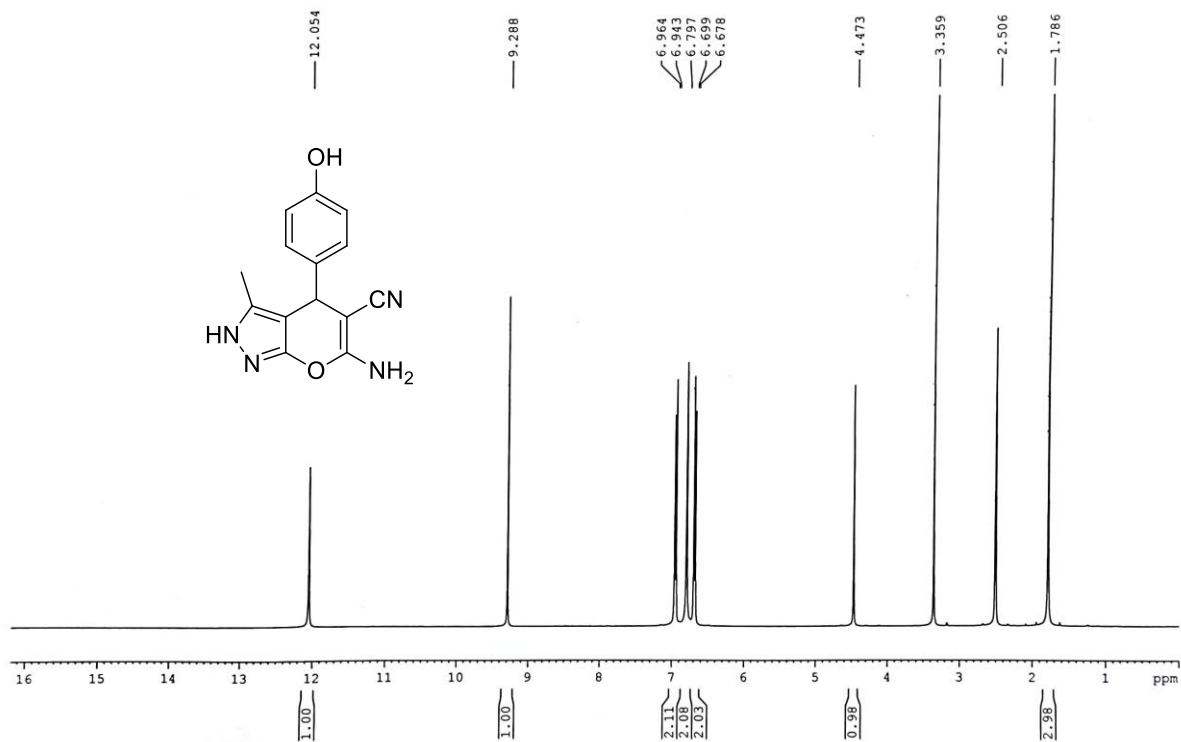

$^{13}\text{C}$  NMR of **1j** (100 MHz, DMSO- $d_6$ )

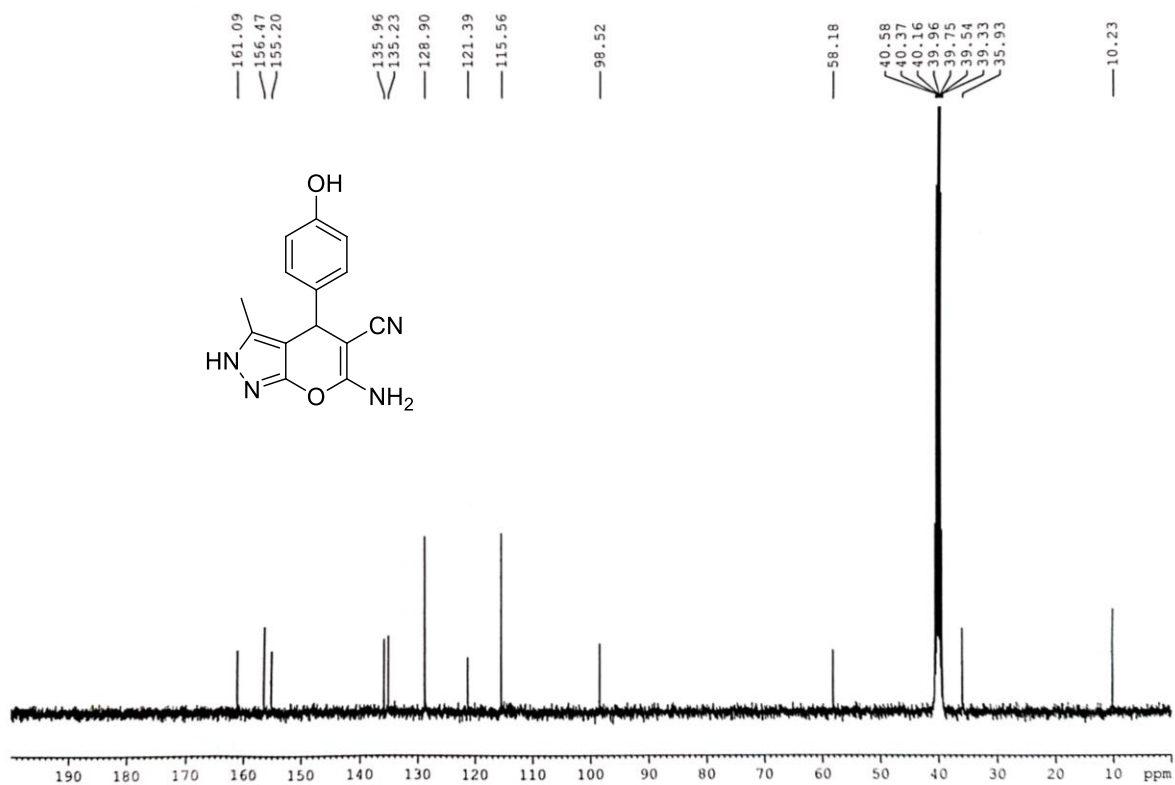

$^1\text{H}$  NMR of **1k** (400 MHz, DMSO- $d_6$ )

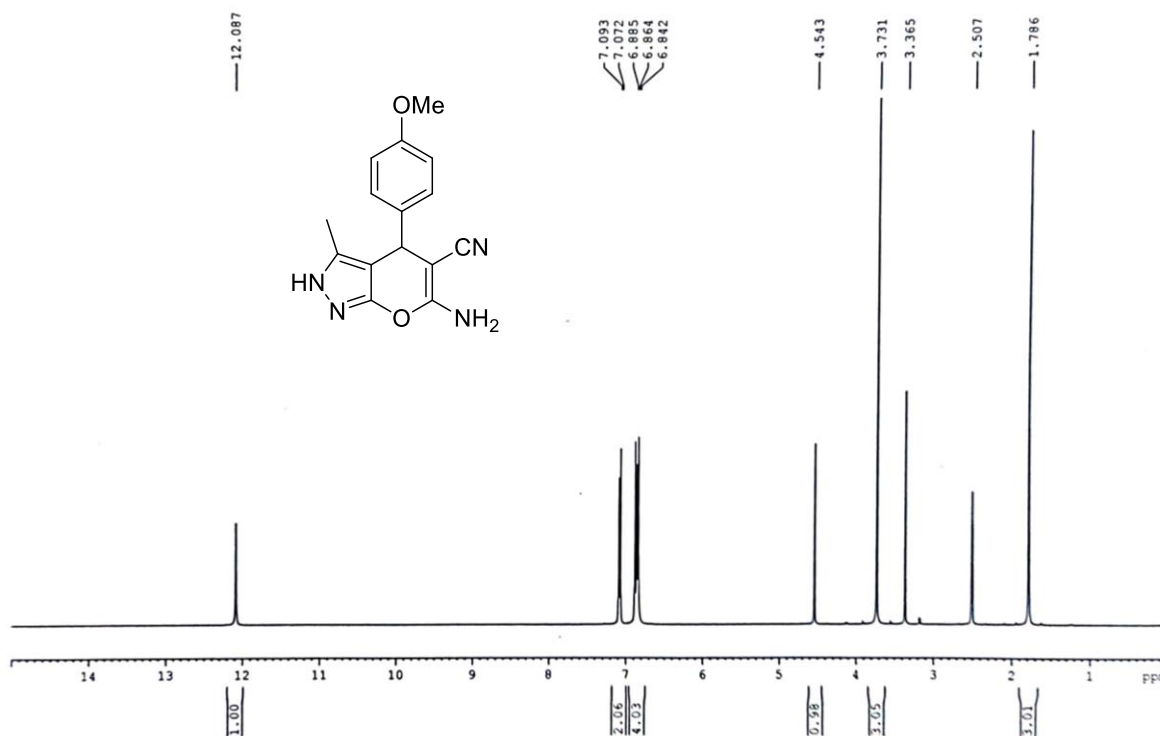

$^{13}\text{C}$  NMR of **1k** (100 MHz, DMSO- $d_6$ )

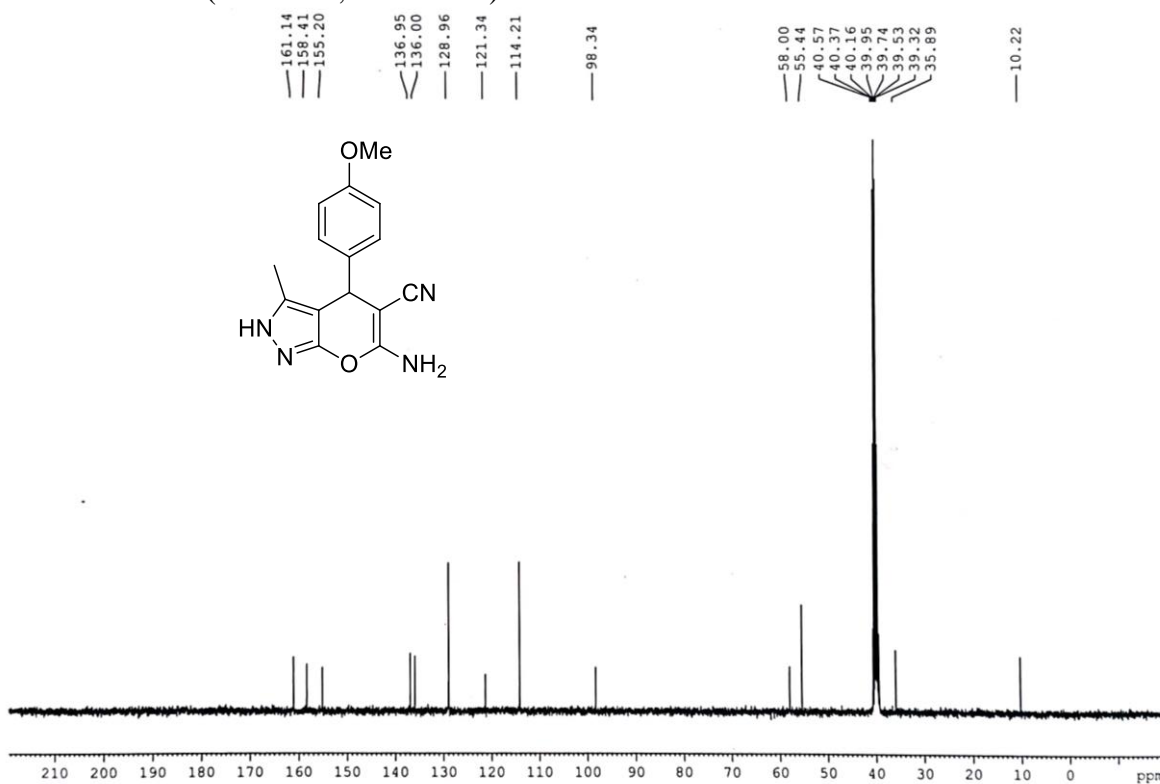

$^1\text{H}$  NMR of **11** (400 MHz, DMSO-d<sub>6</sub>)

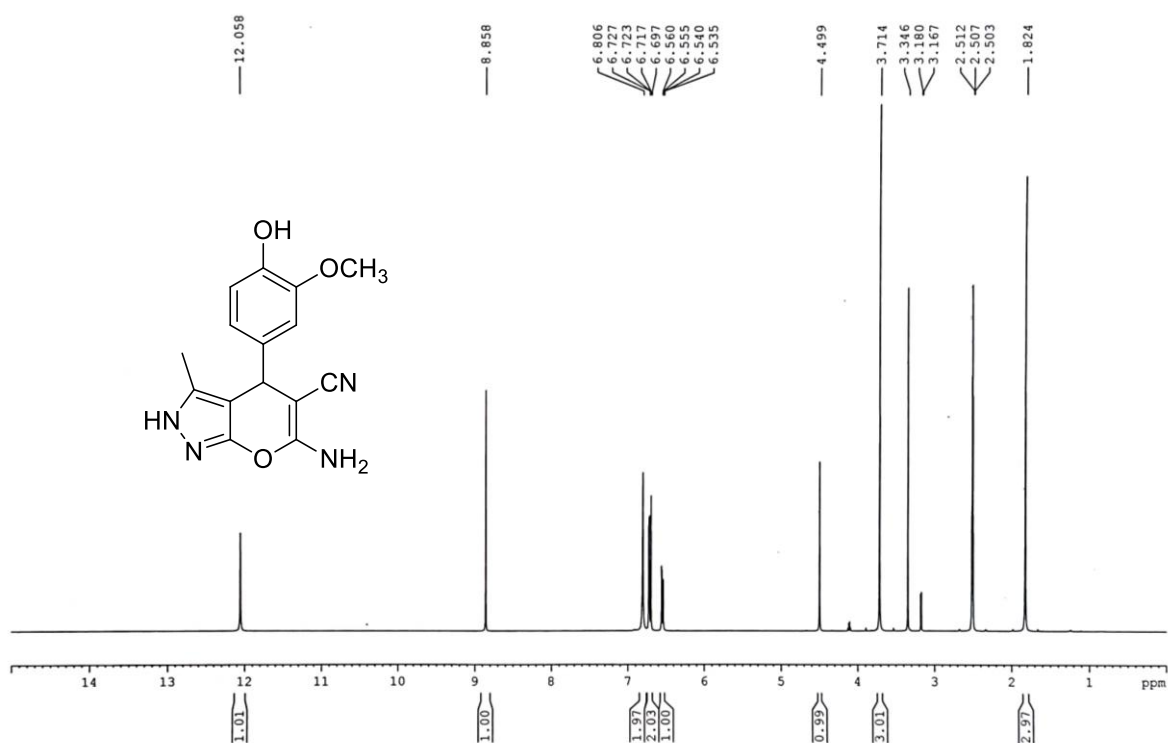

$^{13}\text{C}$  NMR of **11** (100 MHz, DMSO-d<sub>6</sub>)

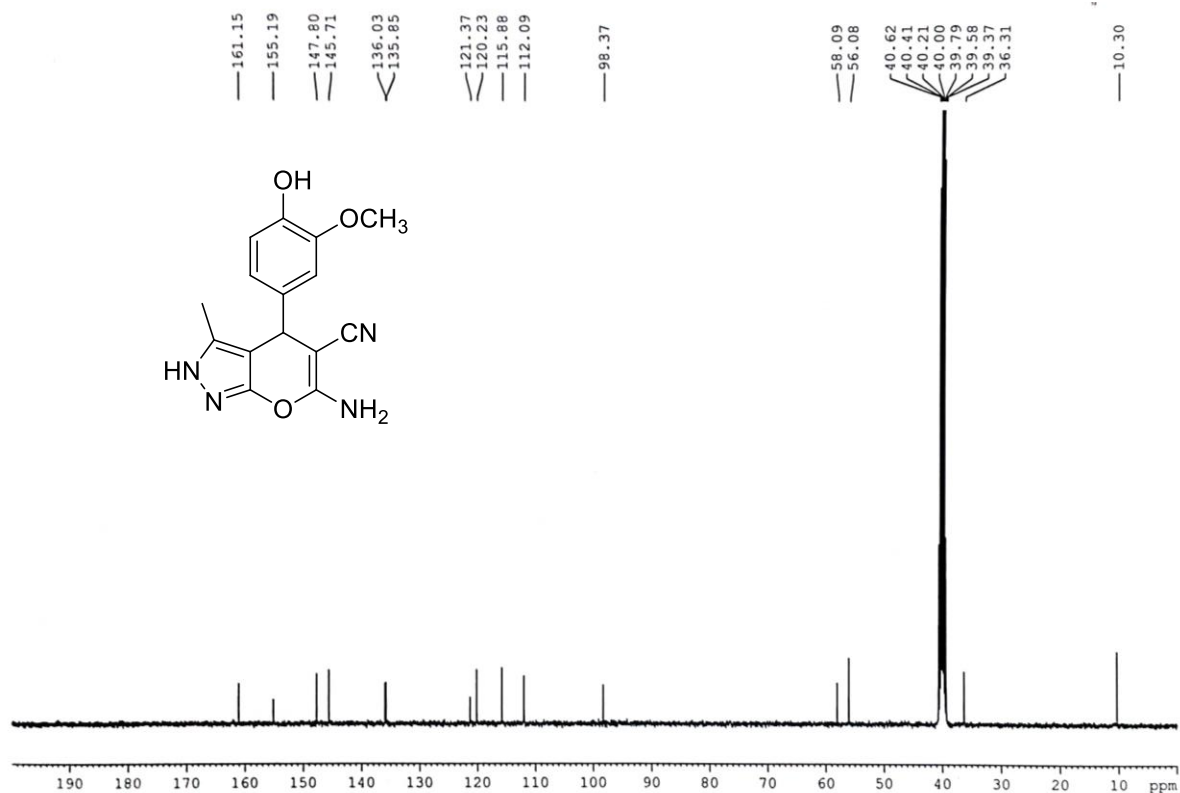

$^1\text{H}$  NMR of **1m** (400 MHz, DMSO- $d_6$ )

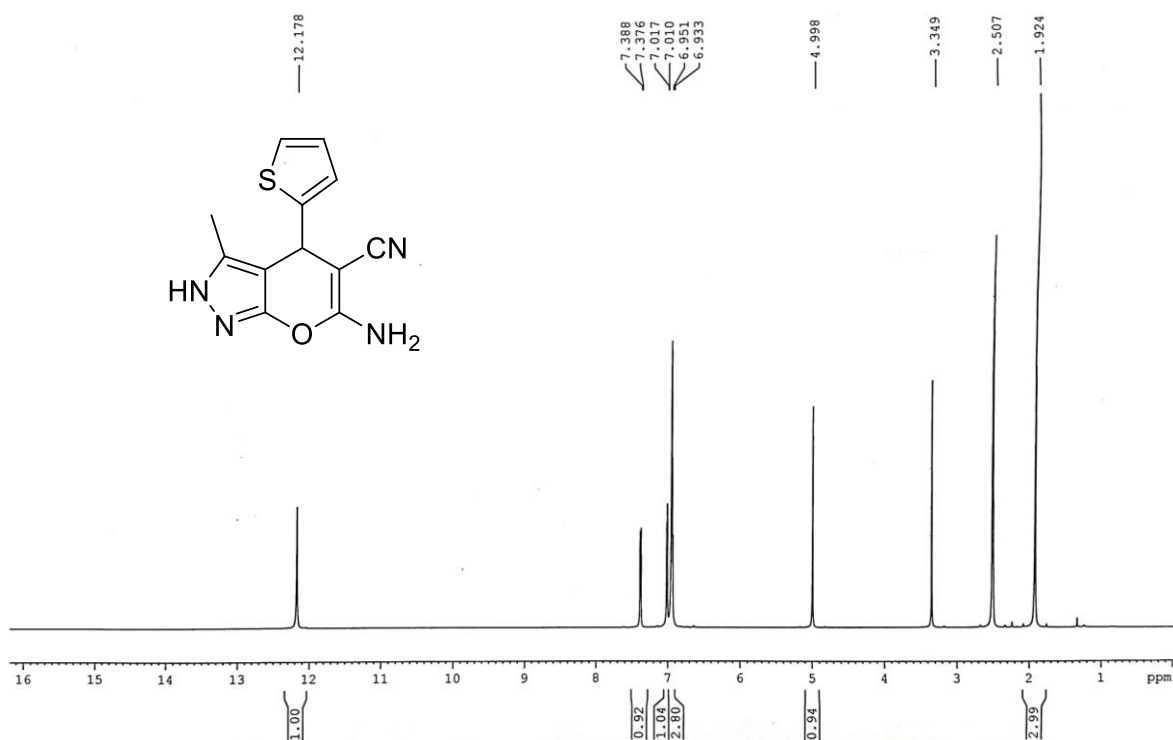

$^{13}\text{C}$  NMR of **1m** (100 MHz, DMSO- $d_6$ )

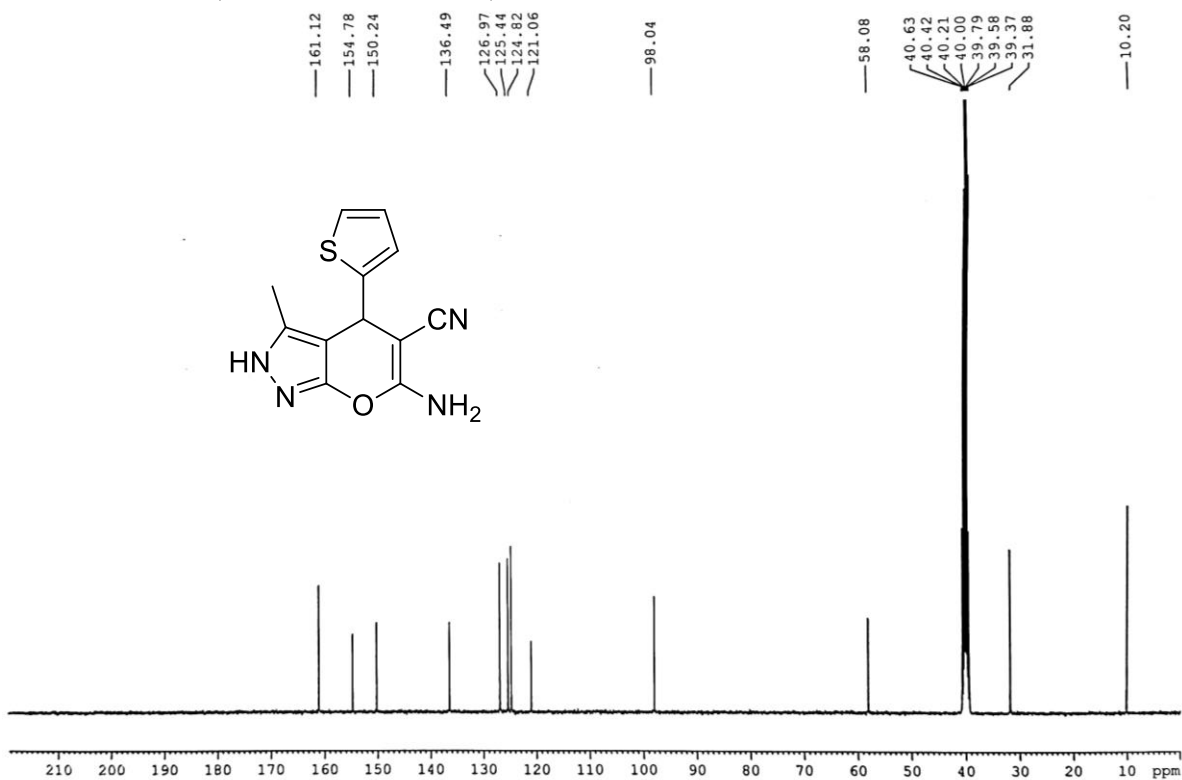

$^1\text{H}$  NMR of **1n** (400 MHz, DMSO- $d_6$ )

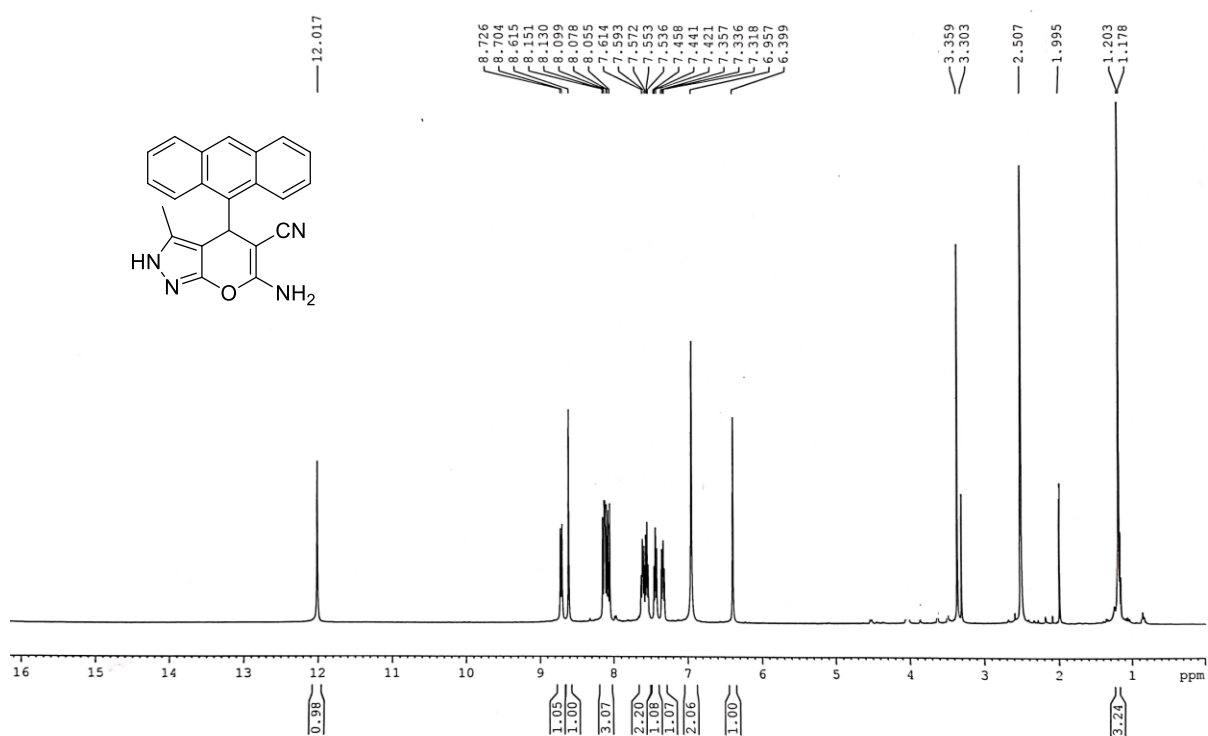

$^{13}\text{C}$  NMR of **1n** (100 MHz, DMSO- $d_6$ )

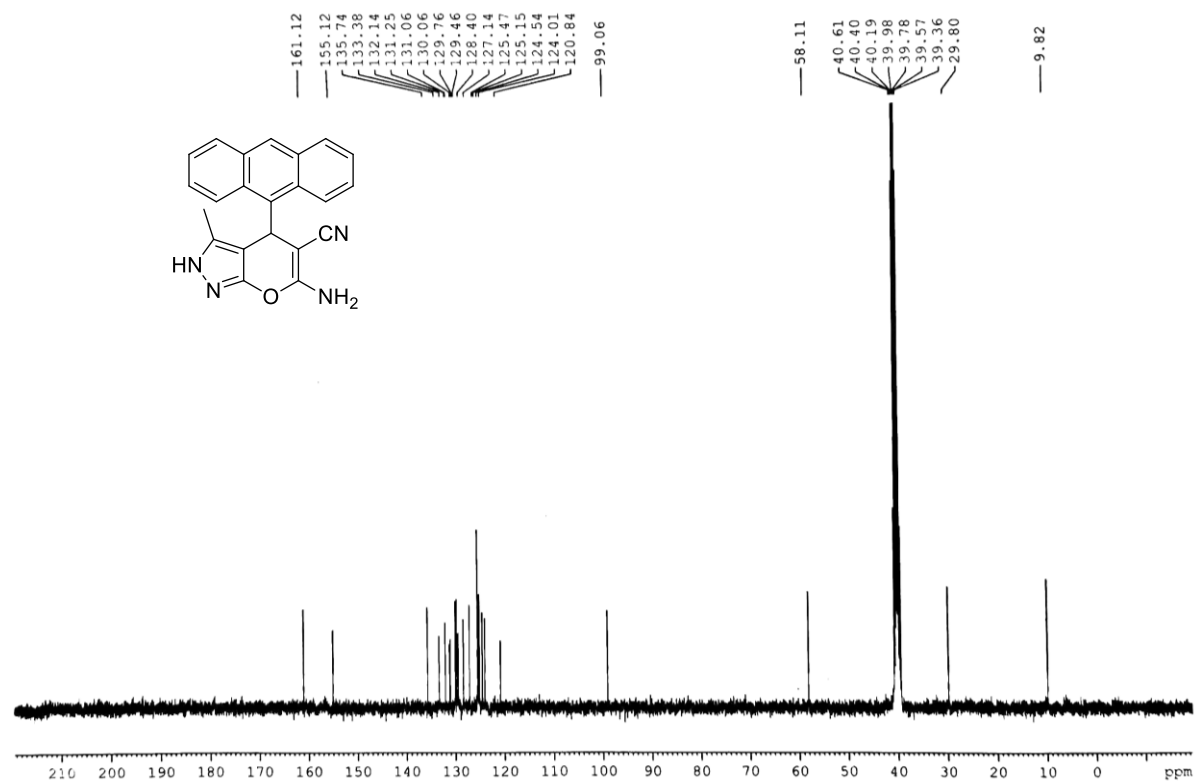

<sup>1</sup>H NMR of **1o** (400 MHz, DMSO-d<sub>6</sub>)

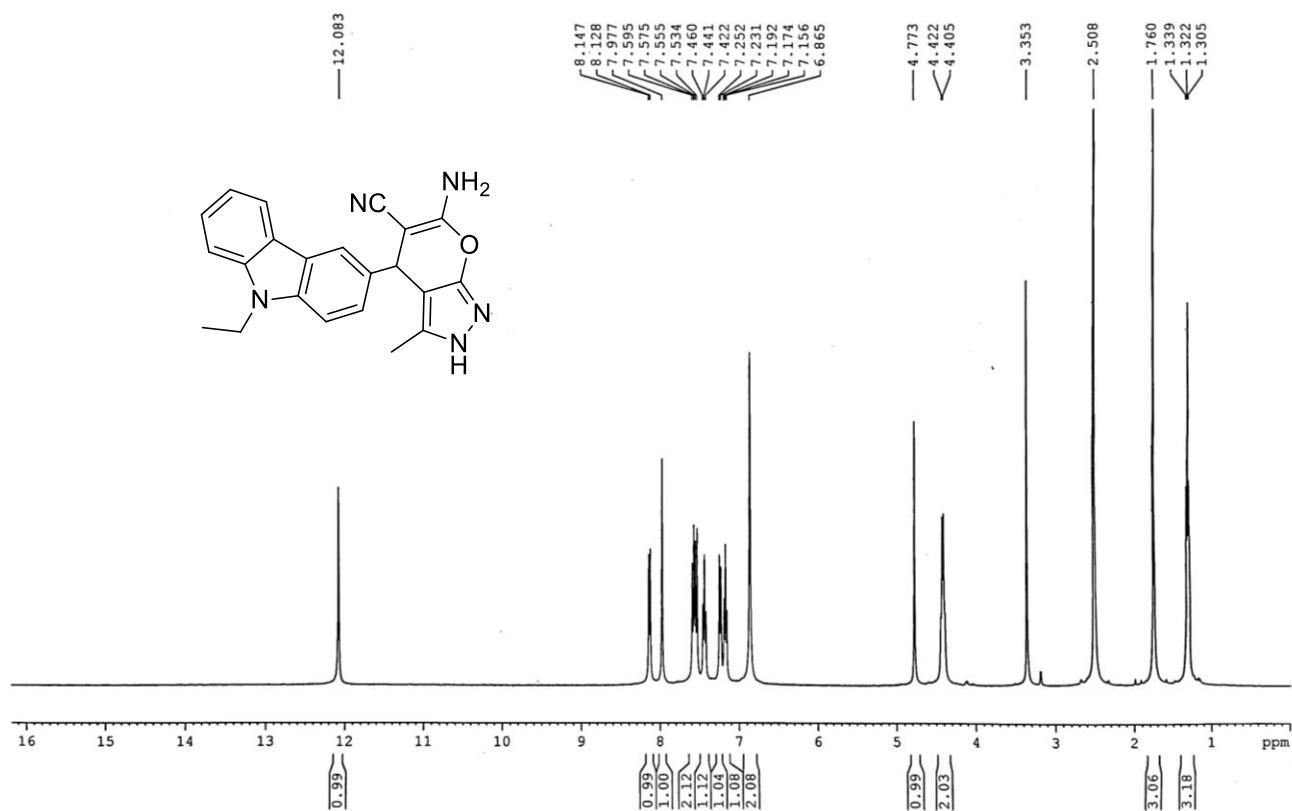

<sup>13</sup>C NMR of **1o** (100 MHz, DMSO-d<sub>6</sub>)

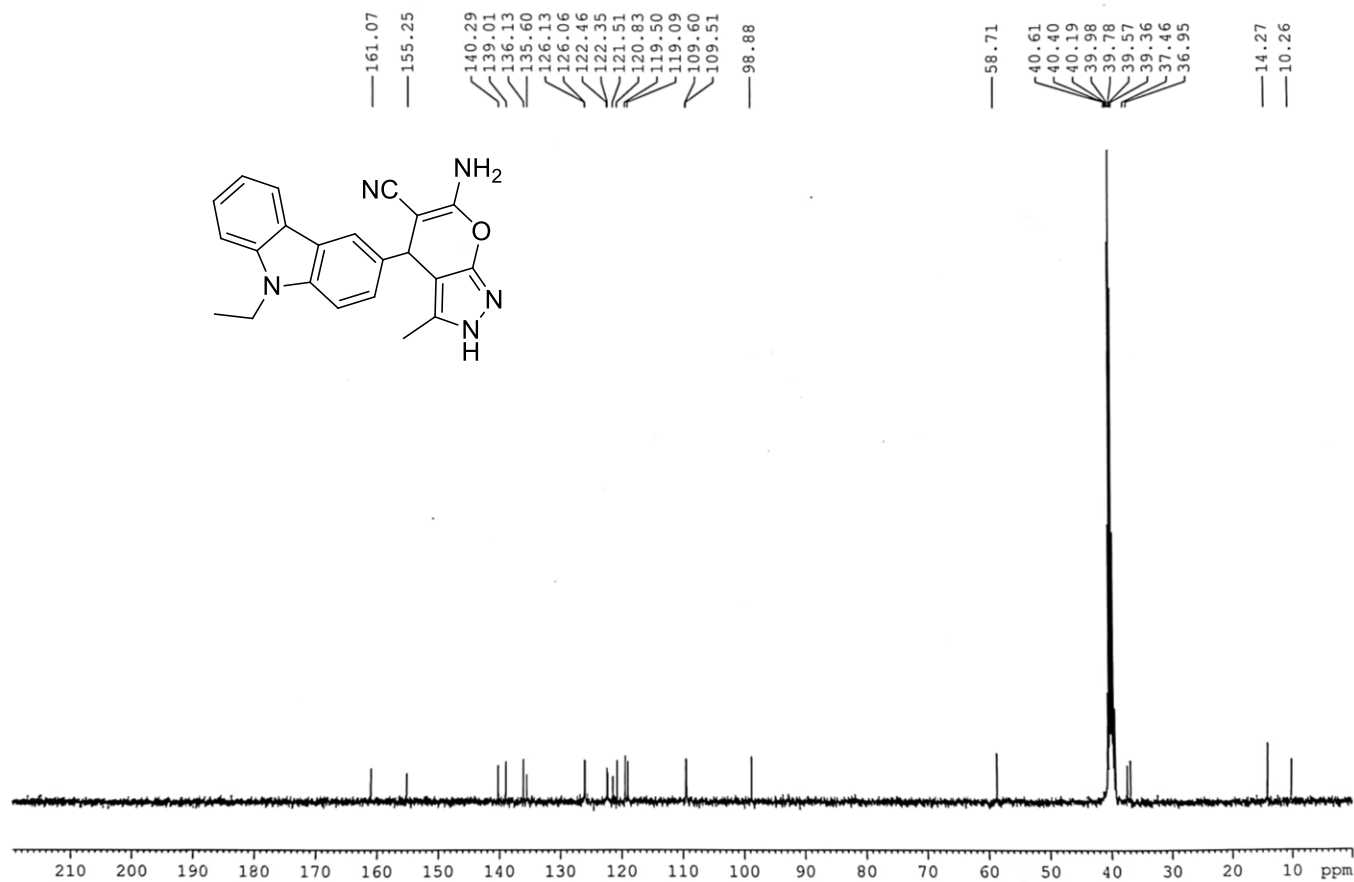

$^1\text{H}$  NMR of **1p** (400 MHz, DMSO- $d_6$ )

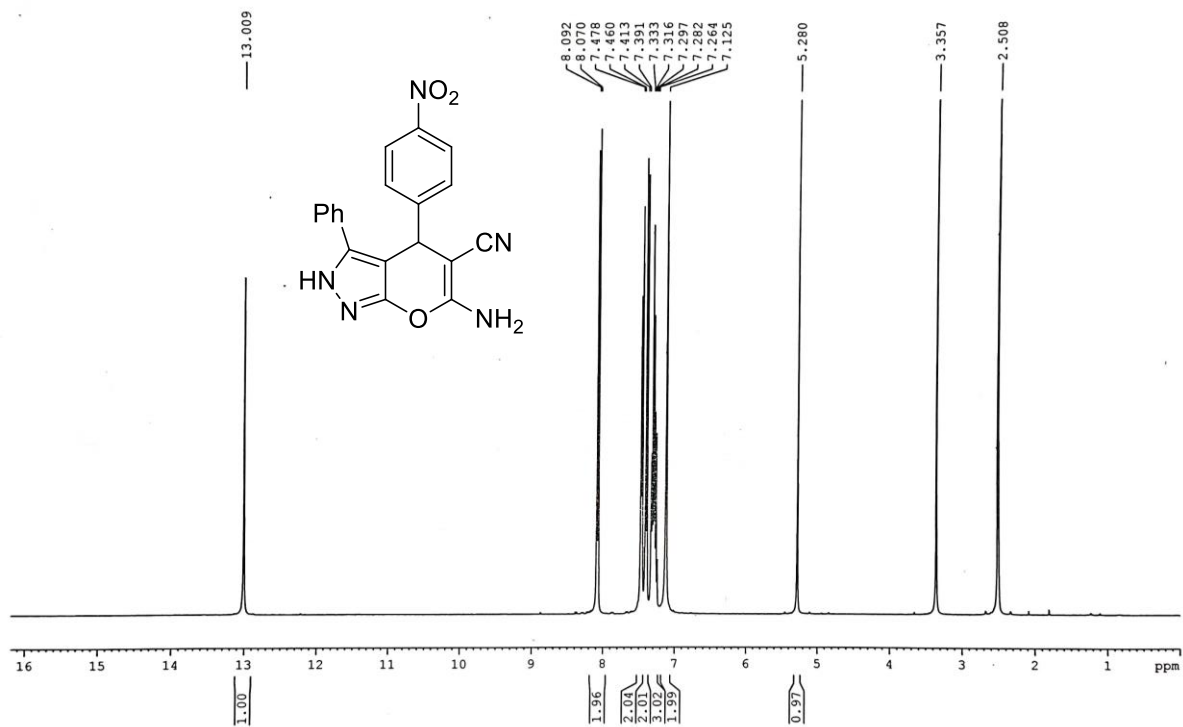

$^{13}\text{C}$  NMR of **1p** (100 MHz, DMSO- $d_6$ )

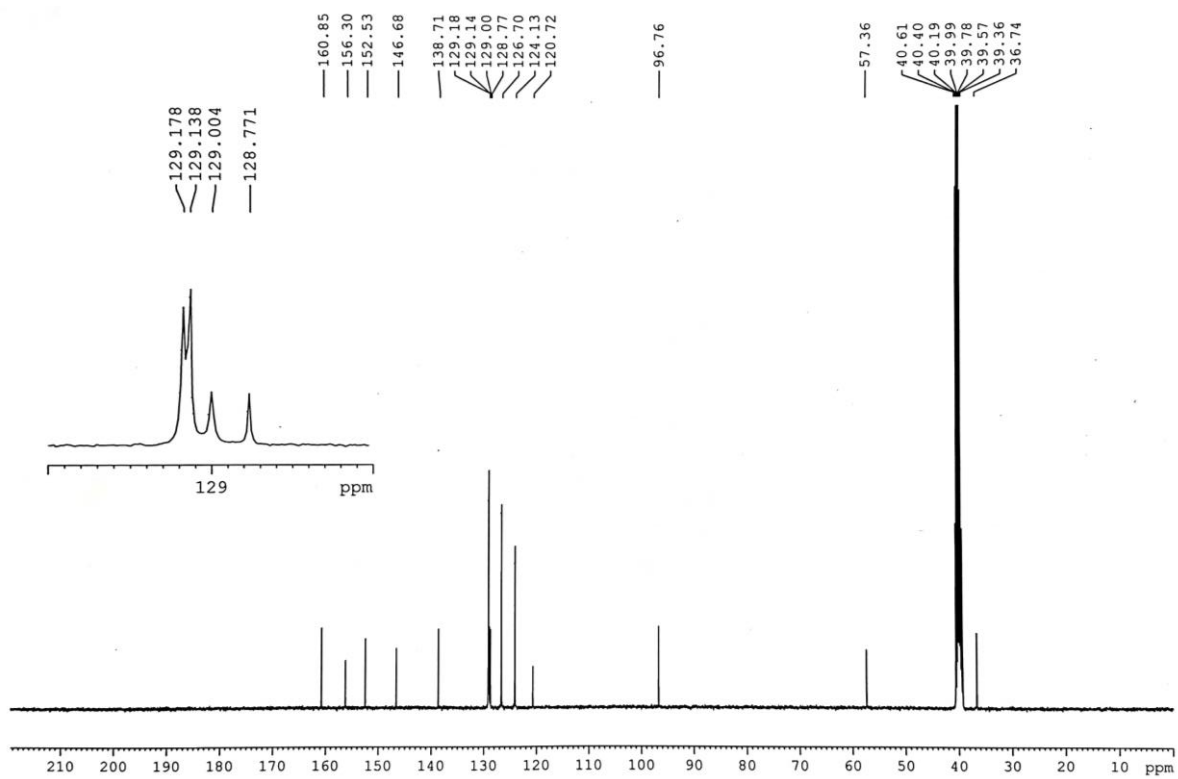



<sup>1</sup>H NMR of **1q** (400 MHz, DMSO-d<sub>6</sub>)

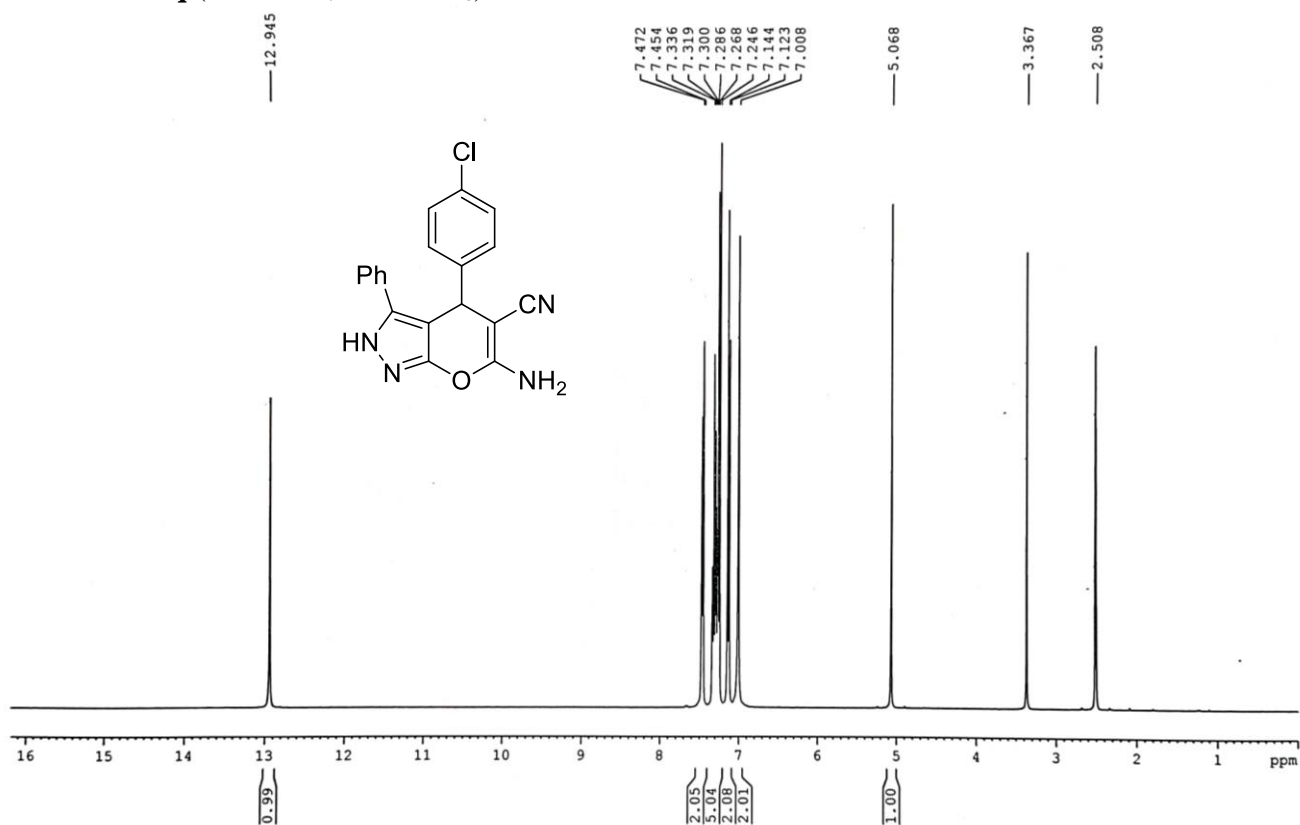

<sup>13</sup>C NMR of **1q** (100 MHz, DMSO-d<sub>6</sub>)

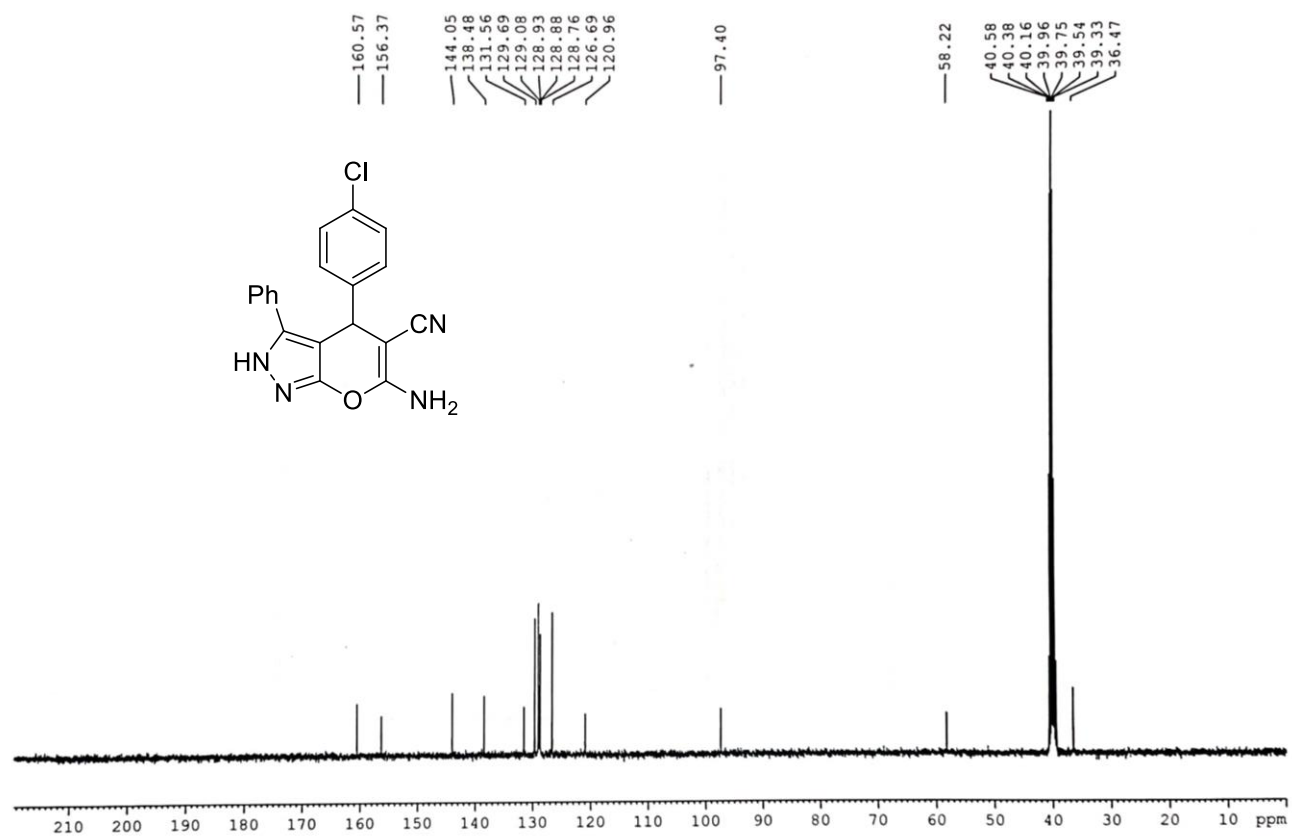

$^1\text{H}$  NMR of **1r** (400 MHz, DMSO- $d_6$ )

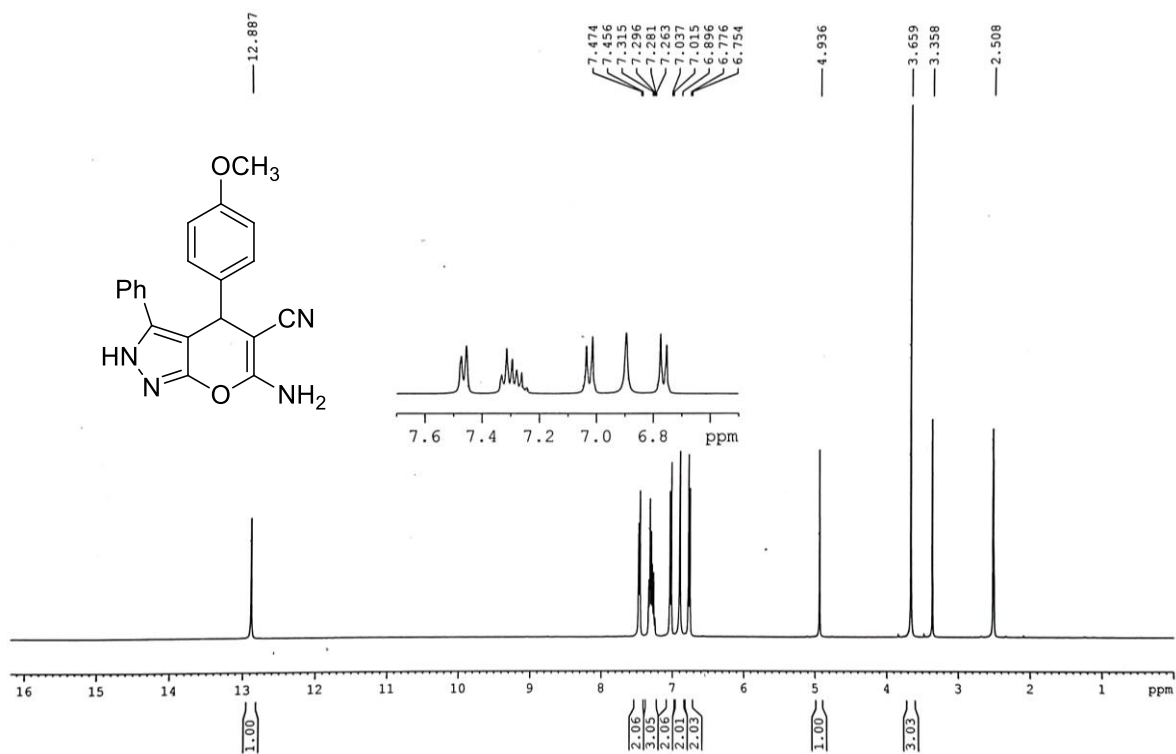

$^{13}\text{C}$  NMR of **1r** (100 MHz, DMSO- $d_6$ )

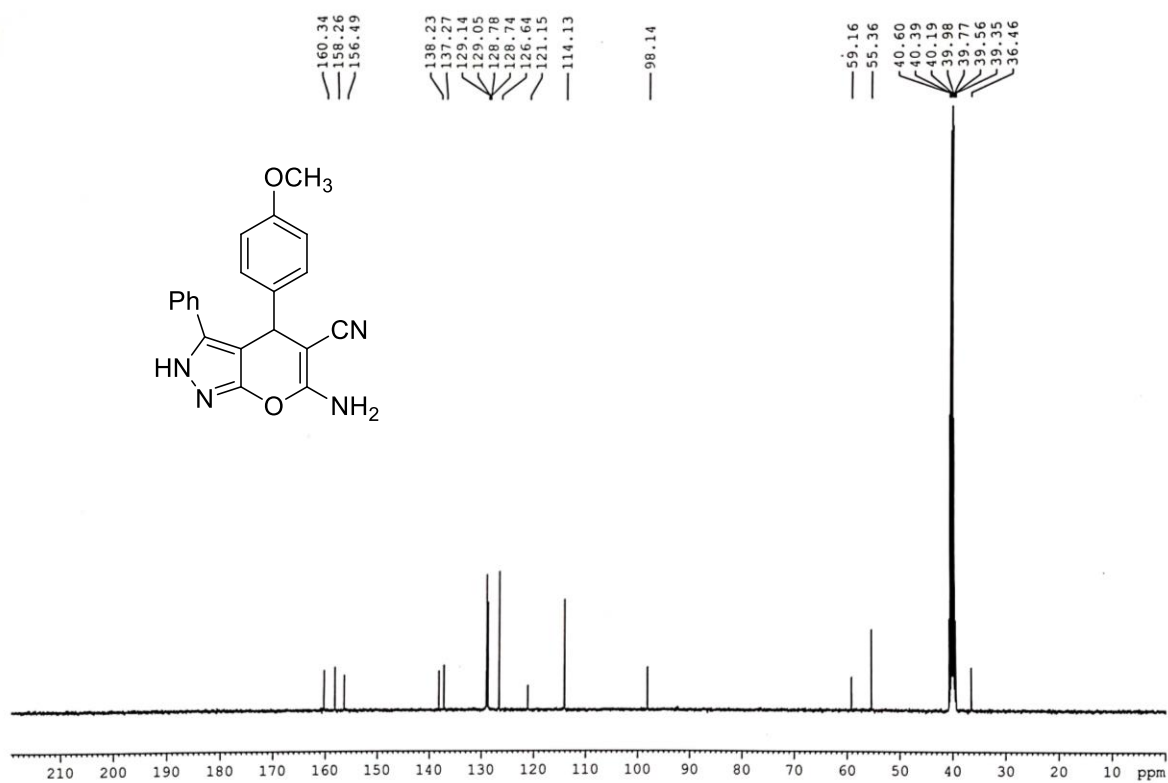

## HRMS of 1n

### Single Mass Analysis

Tolerance = 5.0 PPM / DBE: min = -1.5, max = 50.0

Element prediction: Off

Number of isotope peaks used for i-FIT = 5

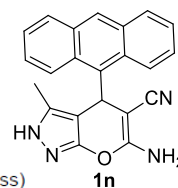

Monoisotopic Mass, Even Electron Ions

354 formula(e) evaluated with 1 results within limits (up to 1 best isotopic matches for each mass)

Elements Used:

C: 1-50 H: 1-100 N: 1-10 O: 1-10

Sample Name : SC\_182

Test Name :

280622\_SC\_182 19 (0.214)

IITRPR

XEVO G2-XS QTOF

1: TOF MS ES+  
1.26e+007

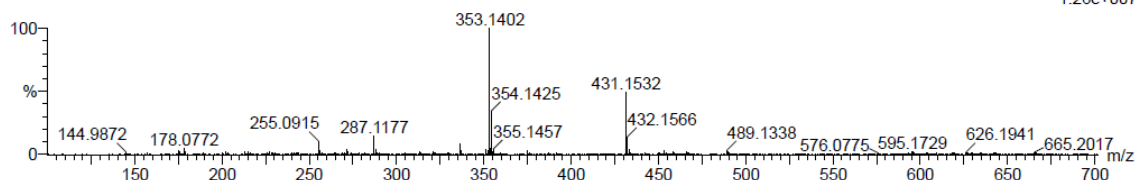

Minimum: -1.5  
Maximum: 2.0 5.0 50.0

| Mass     | Calc. Mass | mDa | PPM | DBE  | i-FIT | Norm | Conf (%) | Formula      |
|----------|------------|-----|-----|------|-------|------|----------|--------------|
| 353.1402 | 353.1402   | 0.0 | 0.0 | 16.5 | 909.4 | n/a  | n/a      | C22 H17 N4 O |

## HRMS of 1o

### Single Mass Analysis

Tolerance = 5.0 PPM / DBE: min = -1.5, max = 50.0

Element prediction: Off

Number of isotope peaks used for i-FIT = 5

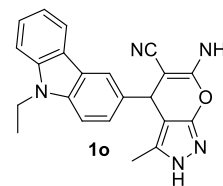

Monoisotopic Mass, Even Electron Ions

366 formula(e) evaluated with 3 results within limits (up to 1 best isotopic matches for each mass)

Elements Used:

C: 1-50 H: 1-100 N: 1-10 O: 1-10

Sample Name : SC\_185

Test Name :

280622\_SC\_185 16 (0.177)

IITRPR

XEVO G2-XS QTOF

1: TOF MS ES+  
4.34e+007

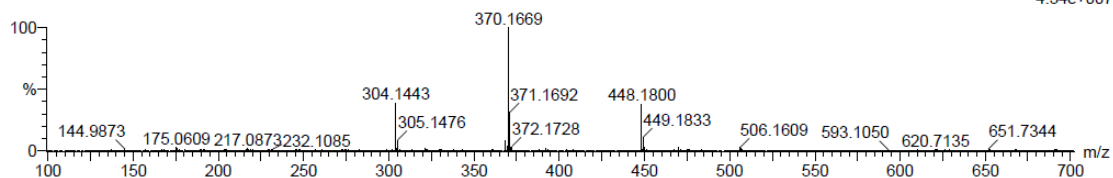

Minimum: -1.5  
Maximum: 2.0 5.0 50.0

| Mass     | Calc. Mass | mDa | PPM | DBE  | i-FIT  | Norm | Conf (%) | Formula      |
|----------|------------|-----|-----|------|--------|------|----------|--------------|
| 370.1669 | 370.1668   | 0.1 | 0.3 | 15.5 | 1274.8 | n/a  | n/a      | C22 H20 N5 O |

# <sup>1</sup>H-<sup>1</sup>H COSY of 1f

122 R 2 1H-1H R

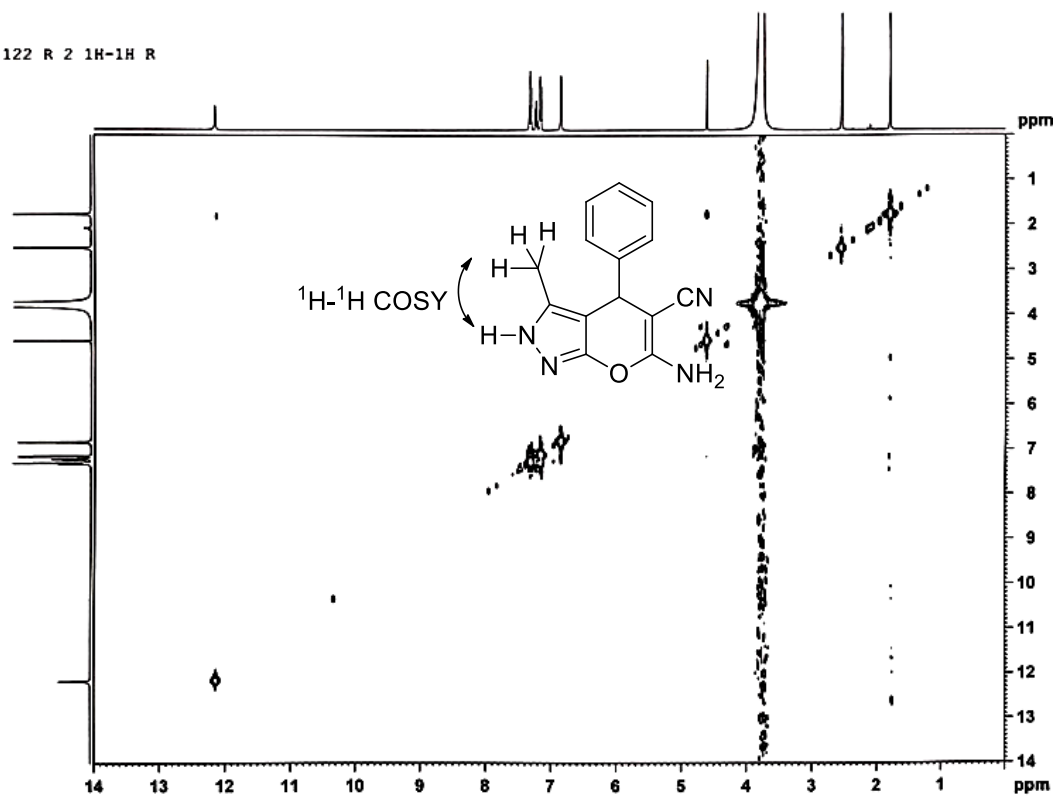

# NOESY Spectrum of 1r

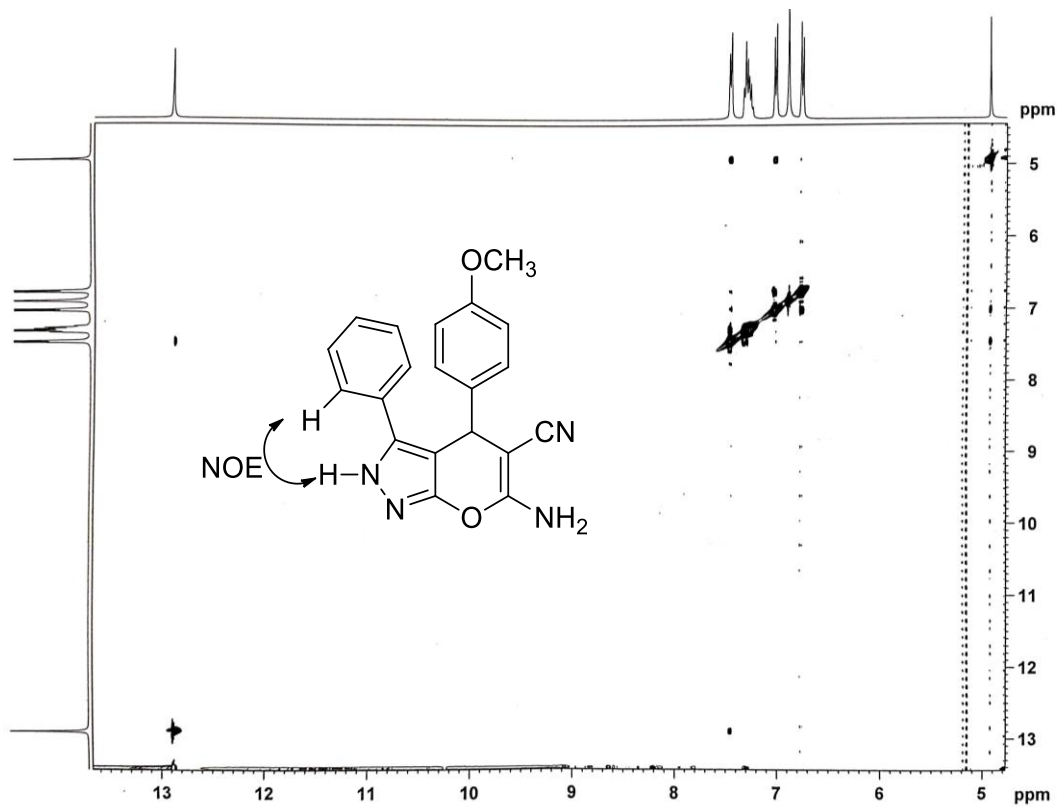

## References:

1. J. Albadi and A. Mansournezhad, *Curr. Chem. Lett.*, 2014, **3**, 221-227.
2. V. N. Bhosale, J. A. Angulwar, G. S. Khansole and G. S. Waghmare, *J. Chem. Pharm. Res.*, 2014, **6**, 733-737.
3. U. D. Nimbalkar, J. A. Seijas, M. P. Vazquez-Tato, M. G. Damale, J. N. Sangshetti and A. P. Nikalje, *Molecules*, 2017, **22**, 1628.
4. G. S. Kumar, C. Kurumurthy, B. Veeraswamy, P. S. Rao, P. S. Rao, B. Narsaiah, *Org. Prep. Proced. Int.*, 2013, **45**, 429-436.
5. M. G. Dehbalaei, N. Foroughifar, H. Pasdar, A. Khajeh-Amiri, N. Foroughifar and M. Alikarami, *Res. Chem. Intermed.*, 2017, **43**, 3035–3051
6. Y. Zou, Y. Hu, H. Liu, D. Q. Shi, *J. Heterocycl. Chem.*, 2013, **50**, 1174-1179.

# X-ray crystallographic data of 1n

## checkCIF/PLATON report

Structure factors have been supplied for datablock(s) rn\_bp\_sc182\_2\_0m\_a

THIS REPORT IS FOR GUIDANCE ONLY. IF USED AS PART OF A REVIEW PROCEDURE FOR PUBLICATION, IT SHOULD NOT REPLACE THE EXPERTISE OF AN EXPERIENCED CRYSTALLOGRAPHIC REFEREE.

No syntax errors found. CIF dictionary Interpreting this report

### Datablock: rn\_bp\_sc182\_2\_0m\_a

---

Bond precision: C-C = 0.0029 A Wavelength=1.54178  
Cell: a=28.496(2) b=28.496(2) c=10.1953(12)  
alpha=90 beta=90 gamma=90  
Temperature: 100 K

|                | Calculated               | Reported     |
|----------------|--------------------------|--------------|
| Volume         | 8278.8(15)               | 8279.0(17)   |
| Space group    | I 41/a                   | I 41/a       |
| Hall group     | -I 4ad                   | -I 4ad       |
| Moiety formula | C22 H16 N4 O [+ solvent] | C22 H16 N4 O |
| Sum formula    | C22 H16 N4 O [+ solvent] | C22 H16 N4 O |
| Mr             | 352.39                   | 352.39       |
| Dx, g cm-3     | 1.131                    | 1.131        |
| Z              | 16                       | 16           |
| Mu (mm-1)      | 0.577                    | 0.577        |
| F000           | 2944.0                   | 2944.0       |
| F000'          | 2952.50                  |              |
| h, k, lmax     | 34, 34, 12               | 34, 34, 12   |
| Nref           | 3804                     | 3782         |
| Tmin, Tmax     | 0.785, 0.891             | 0.630, 0.753 |
| Tmin'          | 0.771                    |              |

Correction method= # Reported T Limits: Tmin=0.630 Tmax=0.753  
AbsCorr = MULTI-SCAN

Data completeness= 0.994 Theta(max)= 68.321

R(reflections)= 0.0639( 3615) wR2(reflections)=  
0.1999( 3782)  
S = 1.075 Npar= 245

---

The following ALERTS were generated. Each ALERT has the format

**test-name\_ALERT\_alert-type\_alert-level.**

Click on the hyperlinks for more details of the test.

---

**Alert level B**

PLAT410\_ALERT\_2\_B Short Intra H...H Contact H3 ..H15 . 1.88 Ang.  
x,y,z = 1\_555 Check

---

**Alert level C**

PLAT420\_ALERT\_2\_C D-H Bond Without Acceptor N2 --H2A . Please Check  
PLAT906\_ALERT\_3\_C Large K Value in the Analysis of Variance ..... 2.223 Check  
PLAT911\_ALERT\_3\_C Missing FCF Refl Between Thmin & STh/L= 0.600 17 Report  
PLAT913\_ALERT\_3\_C Missing # of Very Strong Reflections in FCF .... 6 Note  
PLAT918\_ALERT\_3\_C Reflection(s) with I(obs) much Smaller I(calc) . 10 Check

---

**Alert level G**

PLAT007\_ALERT\_5\_G Number of Unrefined Donor-H Atoms ..... 3 Report  
PLAT072\_ALERT\_2\_G SHELXL First Parameter in WGHT Unusually Large 0.14 Report  
PLAT083\_ALERT\_2\_G SHELXL Second Parameter in WGHT Unusually Large 7.58 Why ?  
PLAT152\_ALERT\_1\_G The Supplied and Calc. Volume s.u. Differ by ... -2 Units  
PLAT605\_ALERT\_4\_G Largest Solvent Accessible VOID in the Structure 450 A\*\*3  
PLAT767\_ALERT\_4\_G INS Embedded LIST 6 Instruction Should be LIST 4 Please Check  
PLAT793\_ALERT\_4\_G Model has Chirality at C15 (Centro SPGR) R Verify  
PLAT910\_ALERT\_3\_G Missing # of FCF Reflection(s) Below Theta(Min). 2 Note  
PLAT912\_ALERT\_4\_G Missing # of FCF Reflections Above STh/L= 0.600 5 Note  
PLAT933\_ALERT\_2\_G Number of HKL-OMIT Records in Embedded .res File 4 Note  
PLAT978\_ALERT\_2\_G Number C-C Bonds with Positive Residual Density. 1 Info

---

- 0 **ALERT level A** = Most likely a serious problem - resolve or explain  
1 **ALERT level B** = A potentially serious problem, consider carefully  
5 **ALERT level C** = Check. Ensure it is not caused by an omission or oversight  
11 **ALERT level G** = General information/check it is not something unexpected

- 1 ALERT type 1 CIF construction/syntax error, inconsistent or missing data  
6 ALERT type 2 Indicator that the structure model may be wrong or deficient  
5 ALERT type 3 Indicator that the structure quality may be low  
4 ALERT type 4 Improvement, methodology, query or suggestion  
1 ALERT type 5 Informative message, check
- 
-

It is advisable to attempt to resolve as many as possible of the alerts in all categories. Often the minor alerts point to easily fixed oversights, errors and omissions in your CIF or refinement strategy, so attention to these fine details can be worthwhile. In order to resolve some of the more serious problems it may be necessary to carry out additional measurements or structure refinements. However, the purpose of your study may justify the reported deviations and the more serious of these should normally be commented upon in the discussion or experimental section of a paper or in the "special\_details" fields of the CIF. checkCIF was carefully designed to identify outliers and unusual parameters, but every test has its limitations and alerts that are not important in a particular case may appear. Conversely, the absence of alerts does not guarantee there are no aspects of the results needing attention. It is up to the individual to critically assess their own results and, if necessary, seek expert advice.

### **Publication of your CIF in IUCr journals**

A basic structural check has been run on your CIF. These basic checks will be run on all CIFs submitted for publication in IUCr journals (*Acta Crystallographica*, *Journal of Applied Crystallography*, *Journal of Synchrotron Radiation*); however, if you intend to submit to *Acta Crystallographica Section C* or *E* or *IUCrData*, you should make sure that full publication checks are run on the final version of your CIF prior to submission.

### **Publication of your CIF in other journals**

Please refer to the *Notes for Authors* of the relevant journal for any special instructions relating to CIF submission.

---

**PLATON version of 18/05/2022; check.def file version of 17/05/2022**



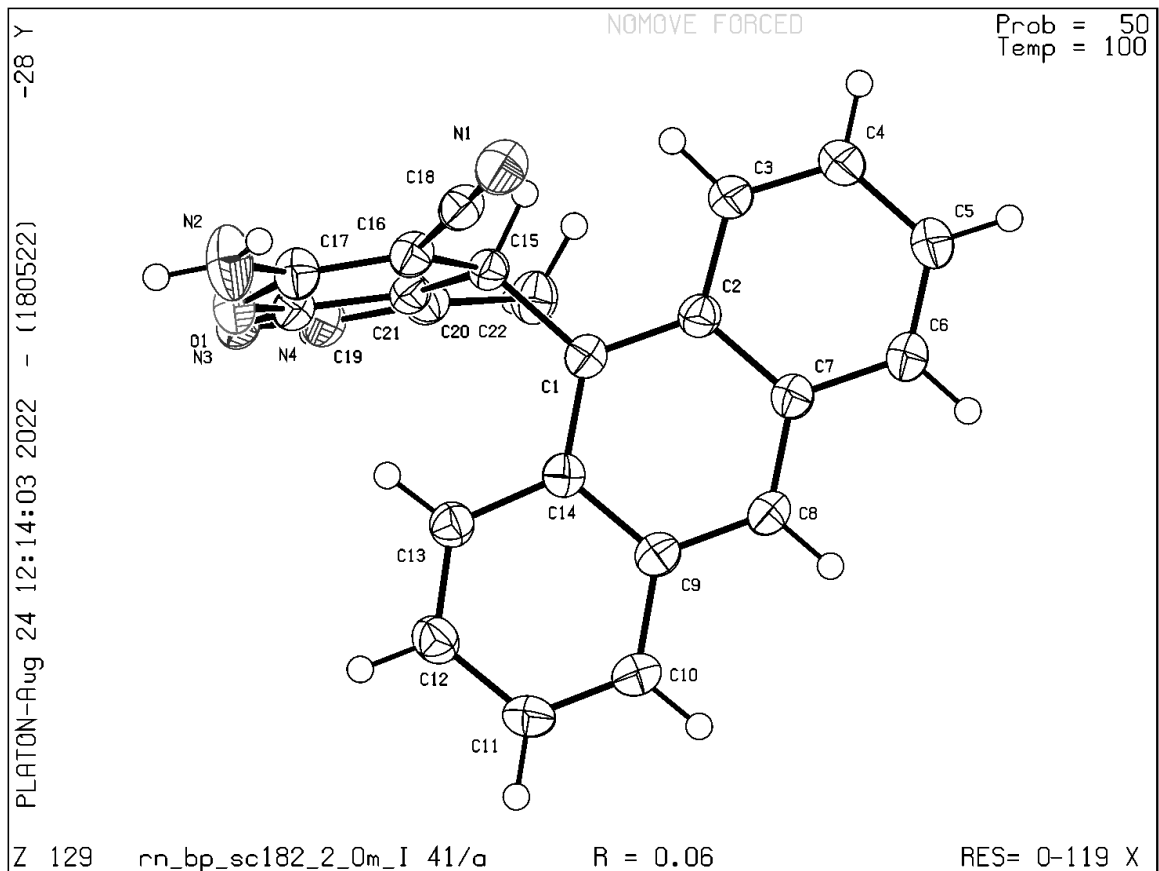

# X-ray crystallographic data of 1o

## checkCIF/PLATON report

Structure factors have been supplied for datablock(s) rn\_bp\_sc185\_0m\_a

THIS REPORT IS FOR GUIDANCE ONLY. IF USED AS PART OF A REVIEW PROCEDURE FOR PUBLICATION, IT SHOULD NOT REPLACE THE EXPERTISE OF AN EXPERIENCED CRYSTALLOGRAPHIC REFEREE.

No syntax errors found.      CIF dictionary      Interpreting this report

### Datablock: rn\_bp\_sc185\_0m\_a

---

|                        |                |                    |              |
|------------------------|----------------|--------------------|--------------|
| Bond precision:        | C-C = 0.0024 Å | Wavelength=1.54178 |              |
| Cell:                  | a=22.861 (2)   | b=22.861 (2)       | c=14.185 (2) |
|                        | alpha=90       | beta=90            | gamma=90     |
| Temperature:           | 101 K          |                    |              |
|                        | Calculated     | Reported           |              |
| Volume                 | 7413.4 (17)    | 7413.4 (17)        |              |
| Space group            | I 41/a         | I 41/a             |              |
| Hall group             | -I 4ad         | -I 4ad             |              |
| Moiety formula         | C22 H19 N5 O   | C22 H19 N5 O       |              |
| Sum formula            | C22 H19 N5 O   | C22 H19 N5 O       |              |
| Mr                     | 369.42         | 369.42             |              |
| Dx, g cm <sup>-3</sup> | 1.324          | 1.324              |              |
| Z                      | 16             | 16                 |              |
| Mu (mm <sup>-1</sup> ) | 0.682          | 0.682              |              |
| F000                   | 3104.0         | 3104.0             |              |
| F000'                  | 3112.91        |                    |              |
| h, k, lmax             | 27, 27, 17     | 27, 27, 17         |              |
| Nref                   | 3404           | 3383               |              |
| Tmin, Tmax             | 0.906, 0.921   | 0.607, 0.753       |              |
| Tmin'                  | 0.884          |                    |              |

Correction method= # Reported T Limits: Tmin=0.607 Tmax=0.753  
AbsCorr = MULTI-SCAN

Data completeness= 0.994      Theta (max)= 68.340

R(reflections)= 0.0466 ( 3059)      wR2(reflections)=  
0.1229 ( 3383)

S = 1.084      Npar= 256

---

The following ALERTS were generated. Each ALERT has the format  
**test-name\_ALERT\_alert-type\_alert-level.**

Click on the hyperlinks for more details of the test.

---

● **Alert level C**

|                   |                                             |       |       |              |
|-------------------|---------------------------------------------|-------|-------|--------------|
| PLAT420_ALERT_2_C | D-H Bond Without Acceptor N5                | --H5  | .     | Please Check |
| PLAT906_ALERT_3_C | Large K Value in the Analysis of Variance   | ..... | 3.945 | Check        |
| PLAT911_ALERT_3_C | Missing FCF Refl Between Thmin & STh/L=     | 0.600 | 13    | Report       |
| PLAT913_ALERT_3_C | Missing # of Very Strong Reflections in FCF | ....  | 4     | Note         |

---

● **Alert level G**

|                   |                                                  |                  |      |              |
|-------------------|--------------------------------------------------|------------------|------|--------------|
| PLAT007_ALERT_5_G | Number of Unrefined Donor-H Atoms                | .....            | 3    | Report       |
| PLAT083_ALERT_2_G | SHELXL Second Parameter in WGHT                  | Unusually Large  | 6.40 | Why ?        |
| PLAT767_ALERT_4_G | INS Embedded LIST 6 Instruction                  | Should be LIST 4 |      | Please Check |
| PLAT793_ALERT_4_G | Model has Chirality at C1                        | (Centro SPGR)    | S    | Verify       |
| PLAT912_ALERT_4_G | Missing # of FCF Reflections Above STh/L=        | 0.600            | 9    | Note         |
| PLAT978_ALERT_2_G | Number C-C Bonds with Positive Residual Density. |                  | 11   | Info         |

---

- 0 **ALERT level A** = Most likely a serious problem - resolve or explain  
0 **ALERT level B** = A potentially serious problem, consider carefully  
4 **ALERT level C** = Check. Ensure it is not caused by an omission or oversight  
6 **ALERT level G** = General information/check it is not something unexpected

- 0 ALERT type 1 CIF construction/syntax error, inconsistent or missing data  
3 ALERT type 2 Indicator that the structure model may be wrong or deficient  
3 ALERT type 3 Indicator that the structure quality may be low  
3 ALERT type 4 Improvement, methodology, query or suggestion  
1 ALERT type 5 Informative message, check
- 
-

It is advisable to attempt to resolve as many as possible of the alerts in all categories. Often the minor alerts point to easily fixed oversights, errors and omissions in your CIF or refinement strategy, so attention to these fine details can be worthwhile. In order to resolve some of the more serious problems it may be necessary to carry out additional measurements or structure refinements. However, the purpose of your study may justify the reported deviations and the more serious of these should normally be commented upon in the discussion or experimental section of a paper or in the "special\_details" fields of the CIF. checkCIF was carefully designed to identify outliers and unusual parameters, but every test has its limitations and alerts that are not important in a particular case may appear. Conversely, the absence of alerts does not guarantee there are no aspects of the results needing attention. It is up to the individual to critically assess their own results and, if necessary, seek expert advice.

### **Publication of your CIF in IUCr journals**

A basic structural check has been run on your CIF. These basic checks will be run on all CIFs submitted for publication in IUCr journals (*Acta Crystallographica*, *Journal of Applied Crystallography*, *Journal of Synchrotron Radiation*); however, if you intend to submit to *Acta Crystallographica Section C* or *E* or *IUCrData*, you should make sure that full publication checks are run on the final version of your CIF prior to submission.

### **Publication of your CIF in other journals**

Please refer to the *Notes for Authors* of the relevant journal for any special instructions relating to CIF submission.

---

**PLATON version of 18/05/2022; check.def file version of 17/05/2022**

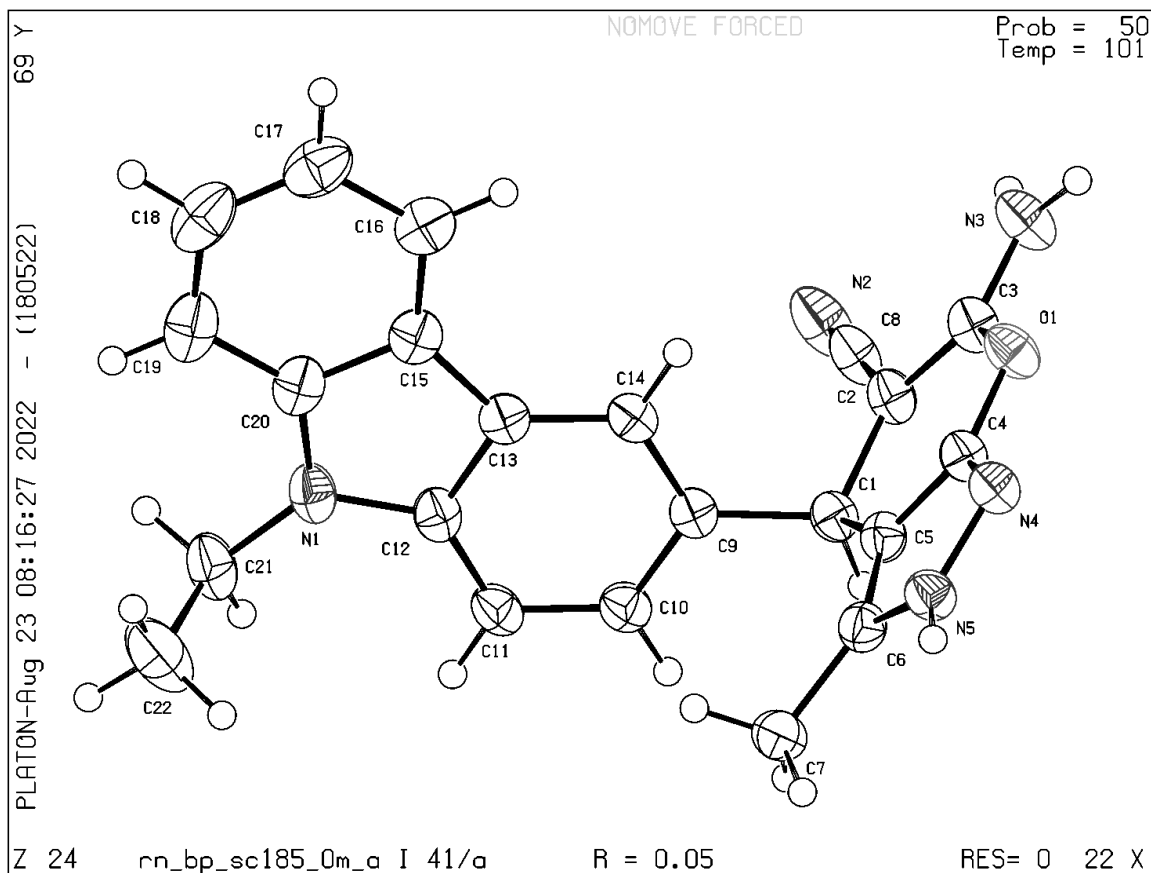

**RN\_BP\_SC182\_2\_0m\_a**

Compound 1n

**Table 1 Crystal data and structure refinement for RN\_BP\_SC182\_2\_0m\_a.**

|                                             |                                                               |
|---------------------------------------------|---------------------------------------------------------------|
| Identification code                         | RN_BP_SC182_2_0m_a                                            |
| Empirical formula                           | C <sub>22</sub> H <sub>16</sub> N <sub>4</sub> O              |
| Formula weight                              | 352.39                                                        |
| Temperature/K                               | 100.00                                                        |
| Crystal system                              | tetragonal                                                    |
| Space group                                 | I4 <sub>1</sub> /a                                            |
| a/Å                                         | 28.496(2)                                                     |
| b/Å                                         | 28.496(2)                                                     |
| c/Å                                         | 10.1953(12)                                                   |
| $\alpha$ /°                                 | 90                                                            |
| $\beta$ /°                                  | 90                                                            |
| $\gamma$ /°                                 | 90                                                            |
| Volume/Å <sup>3</sup>                       | 8279.0(17)                                                    |
| Z                                           | 16                                                            |
| $\rho_{\text{calc}}$ /g/cm <sup>3</sup>     | 1.131                                                         |
| $\mu$ /mm <sup>-1</sup>                     | 0.577                                                         |
| F(000)                                      | 2944.0                                                        |
| Crystal size/mm <sup>3</sup>                | 0.45 × 0.35 × 0.2                                             |
| Radiation                                   | Cu K $\alpha$ ( $\lambda$ = 1.54178)                          |
| 2 $\theta$ range for data collection/°      | 9.212 to 136.642                                              |
| Index ranges                                | -32 ≤ h ≤ 34, -30 ≤ k ≤ 34, -11 ≤ l ≤ 12                      |
| Reflections collected                       | 126607                                                        |
| Independent reflections                     | 3782 [R <sub>int</sub> = 0.0660, R <sub>sigma</sub> = 0.0196] |
| Data/restraints/parameters                  | 3782/0/245                                                    |
| Goodness-of-fit on F <sup>2</sup>           | 1.075                                                         |
| Final R indexes [I ≥ 2 $\sigma$ (I)]        | R <sub>1</sub> = 0.0639, wR <sub>2</sub> = 0.1982             |
| Final R indexes [all data]                  | R <sub>1</sub> = 0.0653, wR <sub>2</sub> = 0.1999             |
| Largest diff. peak/hole / e Å <sup>-3</sup> | 0.30/-0.32                                                    |

**Table 2 Fractional Atomic Coordinates ( $\times 10^4$ ) and Equivalent Isotropic Displacement Parameters ( $\text{\AA}^2 \times 10^3$ ) for RN\_BP\_SC182\_2\_0m\_a.  $U_{eq}$  is defined as 1/3 of the trace of the orthogonalised  $U_{IJ}$  tensor.**

| Atom | x          | y          | z           | U(eq)    |
|------|------------|------------|-------------|----------|
| O1   | 3755.2 (5) | 3437.7 (5) | 7307.6 (14) | 30.9 (3) |
| N1   | 2230.0 (6) | 3583.2 (7) | 5502.2 (18) | 39.9 (5) |
| N2   | 3285.5 (7) | 4031.7 (6) | 6783 (2)    | 49.1 (5) |
| N3   | 4179.0 (6) | 2802.2 (6) | 8114.4 (15) | 28.7 (4) |
| N4   | 4125.7 (6) | 2328.3 (6) | 8015.3 (15) | 29.0 (4) |
| C1   | 3091.0 (6) | 2507.2 (6) | 4767.0 (17) | 25.0 (4) |
| C2   | 2714.0 (6) | 2211.7 (7) | 4407.9 (17) | 26.6 (4) |
| C3   | 2300.6 (7) | 2140.6 (8) | 5186.8 (19) | 34.0 (5) |
| C4   | 1946.3 (8) | 1852.2 (9) | 4789 (2)    | 41.0 (5) |
| C5   | 1975.7 (8) | 1600.4 (9) | 3594 (2)    | 40.7 (5) |
| C6   | 2357.9 (7) | 1659.2 (8) | 2813 (2)    | 35.7 (5) |
| C7   | 2731.0 (7) | 1964.9 (7) | 3176.0 (18) | 29.1 (4) |
| C8   | 3114.5 (7) | 2027.1 (7) | 2348.7 (18) | 29.9 (4) |
| C9   | 3477.2 (7) | 2333.4 (7) | 2659.5 (18) | 29.0 (4) |
| C10  | 3858.8 (7) | 2400.2 (7) | 1772.4 (19) | 33.1 (5) |
| C11  | 4213.2 (7) | 2699.4 (7) | 2053 (2)    | 34.4 (5) |
| C12  | 4201.0 (7) | 2961.3 (7) | 3233 (2)    | 33.1 (5) |
| C13  | 3845.9 (7) | 2906.4 (7) | 4111.8 (19) | 29.0 (4) |
| C14  | 3466.0 (6) | 2585.0 (6) | 3883.7 (18) | 26.0 (4) |
| C15  | 3095.3 (6) | 2720.1 (6) | 6149.3 (17) | 25.0 (4) |
| C16  | 3027.7 (7) | 3251.3 (7) | 6220.8 (18) | 28.3 (4) |
| C17  | 3338.5 (7) | 3565.6 (7) | 6741 (2)    | 32.0 (5) |
| C18  | 2590.3 (7) | 3436.2 (7) | 5813.2 (19) | 30.5 (4) |
| C19  | 3818.3 (7) | 2961.7 (7) | 7438.1 (18) | 27.0 (4) |
| C20  | 3532.4 (6) | 2615.3 (6) | 6915.3 (17) | 24.8 (4) |
| C21  | 3743.2 (7) | 2203.6 (7) | 7308.8 (18) | 27.5 (4) |
| C22  | 3615.9 (8) | 1704.0 (7) | 7055 (2)    | 34.2 (5) |

**Table 3 Anisotropic Displacement Parameters ( $\text{\AA}^2 \times 10^3$ ) for RN\_BP\_SC182\_2\_0m\_a.  
The Anisotropic displacement factor exponent takes the form:**

$$-2\pi^2[h^2a^2U_{11}+2hka*b*U_{12}+...].$$

| Atom | $U_{11}$  | $U_{22}$  | $U_{33}$  | $U_{23}$  | $U_{13}$   | $U_{12}$  |
|------|-----------|-----------|-----------|-----------|------------|-----------|
| O1   | 28.6 (7)  | 25.8 (7)  | 38.5 (8)  | -2.8 (5)  | -6.9 (6)   | 0.7 (5)   |
| N1   | 34.0 (10) | 45.0 (10) | 40.8 (10) | -7.3 (8)  | -5.6 (8)   | 10.2 (8)  |
| N2   | 43.8 (11) | 27.8 (9)  | 75.7 (14) | -7.6 (9)  | -22.2 (10) | 5.2 (8)   |
| N3   | 29.2 (8)  | 29.4 (8)  | 27.5 (8)  | -2.5 (6)  | -2.5 (6)   | 1.5 (6)   |
| N4   | 31.1 (8)  | 28.9 (8)  | 27.0 (8)  | -0.1 (6)  | -3.8 (6)   | 1.7 (6)   |
| C1   | 26.0 (9)  | 24.7 (9)  | 24.4 (9)  | -0.2 (7)  | -2.1 (7)   | 2.7 (7)   |
| C2   | 26.6 (9)  | 29.3 (9)  | 24.0 (9)  | -0.1 (7)  | -1.2 (7)   | 0.2 (7)   |
| C3   | 30.1 (10) | 44.8 (12) | 27.0 (9)  | -5.2 (8)  | 2.1 (8)    | -6.0 (8)  |
| C4   | 31.0 (11) | 57.4 (14) | 34.6 (11) | -6.3 (10) | 3.5 (8)    | -12.8 (9) |
| C5   | 34.3 (11) | 51.5 (13) | 36.4 (11) | -7.3 (9)  | -1.4 (9)   | -13.9 (9) |
| C6   | 36.5 (11) | 41.3 (12) | 29.3 (10) | -6.4 (8)  | -2.1 (8)   | -8.2 (9)  |
| C7   | 29.3 (10) | 31.8 (10) | 26.1 (9)  | -1.3 (7)  | -1.4 (7)   | -2.5 (8)  |
| C8   | 34.1 (10) | 31.7 (10) | 23.9 (9)  | -4.8 (7)  | 0.8 (7)    | -1.4 (8)  |
| C9   | 31.3 (10) | 30.3 (10) | 25.4 (9)  | 0.0 (7)   | 0.2 (7)    | 0.8 (8)   |
| C10  | 35.4 (11) | 37.3 (11) | 26.5 (10) | -1.6 (8)  | 4.6 (8)    | -0.4 (8)  |
| C11  | 33.0 (10) | 37.9 (11) | 32.2 (10) | 3.5 (8)   | 7.9 (8)    | -1.9 (8)  |
| C12  | 32.6 (10) | 33.1 (10) | 33.7 (10) | 3.3 (8)   | 0.5 (8)    | -5.7 (8)  |
| C13  | 30.1 (10) | 29.3 (9)  | 27.7 (9)  | 0.7 (7)   | -0.8 (7)   | -1.2 (7)  |
| C14  | 26.5 (9)  | 25.6 (9)  | 25.8 (9)  | 1.1 (7)   | -1.7 (7)   | 0.8 (7)   |
| C15  | 24.0 (9)  | 27.6 (9)  | 23.5 (9)  | -1.8 (7)  | -0.6 (7)   | 0.0 (7)   |
| C16  | 27.6 (9)  | 29.3 (10) | 28.0 (9)  | -2.9 (7)  | -2.4 (7)   | 4.2 (7)   |
| C17  | 30.6 (10) | 28.0 (10) | 37.4 (11) | -2.6 (8)  | -3.9 (8)   | 2.8 (8)   |
| C18  | 32.2 (11) | 32.0 (10) | 27.1 (9)  | -4.4 (7)  | -0.3 (8)   | 2.7 (8)   |
| C19  | 28.7 (9)  | 26.2 (9)  | 26.2 (9)  | -2.6 (7)  | 0.5 (7)    | 0.4 (7)   |
| C20  | 24.7 (9)  | 28.3 (9)  | 21.3 (8)  | -1.6 (7)  | 0.1 (7)    | -0.1 (7)  |
| C21  | 29.1 (9)  | 29.9 (10) | 23.3 (9)  | -0.6 (7)  | 0.5 (7)    | 0.7 (7)   |
| C22  | 38.7 (11) | 27.7 (10) | 36.0 (10) | -0.1 (8)  | -3.3 (8)   | -0.3 (8)  |



**Table 4 Bond Lengths for RN\_BP\_SC182\_2\_0m\_a.**

| Atom | Atom | Length/Å  | Atom | Atom | Length/Å  |
|------|------|-----------|------|------|-----------|
| O1   | C17  | 1.370 (2) | C7   | C8   | 1.392 (3) |
| O1   | C19  | 1.375 (2) | C8   | C9   | 1.389 (3) |
| N1   | C18  | 1.154 (3) | C9   | C10  | 1.427 (3) |
| N2   | C17  | 1.338 (3) | C9   | C14  | 1.440 (3) |
| N3   | N4   | 1.363 (2) | C10  | C11  | 1.352 (3) |
| N3   | C19  | 1.319 (2) | C11  | C12  | 1.417 (3) |
| N4   | C21  | 1.354 (2) | C12  | C13  | 1.360 (3) |
| C1   | C2   | 1.413 (3) | C13  | C14  | 1.437 (3) |
| C1   | C14  | 1.415 (3) | C15  | C16  | 1.528 (3) |
| C1   | C15  | 1.534 (2) | C15  | C20  | 1.500 (2) |
| C2   | C3   | 1.435 (3) | C16  | C17  | 1.366 (3) |
| C2   | C7   | 1.440 (3) | C16  | C18  | 1.416 (3) |
| C3   | C4   | 1.363 (3) | C19  | C20  | 1.386 (3) |
| C4   | C5   | 1.417 (3) | C20  | C21  | 1.378 (3) |
| C5   | C6   | 1.359 (3) | C21  | C22  | 1.492 (3) |
| C6   | C7   | 1.424 (3) |      |      |           |

**Table 5 Bond Angles for RN\_BP\_SC182\_2\_0m\_a.**

| Atom | Atom | Atom | Angle/°     | Atom | Atom | Atom | Angle/°     |
|------|------|------|-------------|------|------|------|-------------|
| C17  | O1   | C19  | 114.62 (15) | C12  | C13  | C14  | 121.81 (18) |
| C19  | N3   | N4   | 102.46 (15) | C1   | C14  | C9   | 119.37 (17) |
| C21  | N4   | N3   | 112.92 (15) | C1   | C14  | C13  | 124.46 (17) |
| C2   | C1   | C14  | 120.17 (16) | C13  | C14  | C9   | 116.17 (17) |
| C2   | C1   | C15  | 118.66 (16) | C16  | C15  | C1   | 115.76 (15) |
| C14  | C1   | C15  | 121.10 (16) | C20  | C15  | C1   | 113.95 (15) |
| C1   | C2   | C3   | 124.38 (17) | C20  | C15  | C16  | 106.08 (15) |
| C1   | C2   | C7   | 119.43 (17) | C17  | C16  | C15  | 125.89 (17) |
| C3   | C2   | C7   | 116.19 (17) | C17  | C16  | C18  | 116.14 (17) |
| C4   | C3   | C2   | 121.89 (19) | C18  | C16  | C15  | 117.76 (16) |
| C3   | C4   | C5   | 121.2 (2)   | N2   | C17  | O1   | 110.38 (17) |
| C6   | C5   | C4   | 119.25 (19) | N2   | C17  | C16  | 126.18 (19) |
| C5   | C6   | C7   | 121.44 (19) | C16  | C17  | O1   | 123.44 (17) |
| C6   | C7   | C2   | 120.02 (18) | N1   | C18  | C16  | 178.7 (2)   |
| C8   | C7   | C2   | 119.53 (17) | O1   | C19  | C20  | 126.05 (17) |
| C8   | C7   | C6   | 120.46 (18) | N3   | C19  | O1   | 119.51 (16) |
| C9   | C8   | C7   | 121.73 (18) | N3   | C19  | C20  | 114.44 (17) |
| C8   | C9   | C10  | 120.40 (18) | C19  | C20  | C15  | 123.11 (16) |
| C8   | C9   | C14  | 119.61 (17) | C21  | C20  | C15  | 133.08 (17) |
| C10  | C9   | C14  | 119.99 (18) | C21  | C20  | C19  | 103.78 (16) |
| C11  | C10  | C9   | 121.29 (19) | N4   | C21  | C20  | 106.40 (16) |
| C10  | C11  | C12  | 119.56 (18) | N4   | C21  | C22  | 122.58 (17) |
| C13  | C12  | C11  | 121.13 (19) | C20  | C21  | C22  | 131.02 (17) |

**Table 6 Torsion Angles for RN\_BP\_SC182\_2\_0m\_a.**

| A  | B   | C   | D   | Angle/°      | A   | B   | C   | D   | Angle/°      |
|----|-----|-----|-----|--------------|-----|-----|-----|-----|--------------|
| O1 | C19 | C20 | C15 | -2.0 (3)     | C9  | C10 | C11 | C12 | -1.6 (3)     |
| O1 | C19 | C20 | C21 | 179.63 (17)  | C10 | C9  | C14 | C1  | -178.56 (17) |
| N3 | N4  | C21 | C20 | 0.2 (2)      | C10 | C9  | C14 | C13 | 1.9 (3)      |
| N3 | N4  | C21 | C22 | 179.31 (17)  | C10 | C11 | C12 | C13 | 2.1 (3)      |
| N3 | C19 | C20 | C15 | 178.02 (16)  | C11 | C12 | C13 | C14 | -0.5 (3)     |
| N3 | C19 | C20 | C21 | -0.4 (2)     | C12 | C13 | C14 | C1  | 179.00 (18)  |
| N4 | N3  | C19 | O1  | -179.54 (16) | C12 | C13 | C14 | C9  | -1.4 (3)     |
| N4 | N3  | C19 | C20 | 0.5 (2)      | C14 | C1  | C2  | C3  | -174.72 (18) |
| C1 | C2  | C3  | C4  | 179.7 (2)    | C14 | C1  | C2  | C7  | 4.4 (3)      |
| C1 | C2  | C7  | C6  | 178.82 (18)  | C14 | C1  | C15 | C16 | 70.8 (2)     |
| C1 | C2  | C7  | C8  | -1.1 (3)     | C14 | C1  | C15 | C20 | -52.7 (2)    |
| C1 | C15 | C16 | C17 | -120.1 (2)   | C14 | C9  | C10 | C11 | -0.4 (3)     |
| C1 | C15 | C16 | C18 | 65.4 (2)     | C15 | C1  | C2  | C3  | 8.2 (3)      |
| C1 | C15 | C20 | C19 | 123.06 (19)  | C15 | C1  | C2  | C7  | -172.71 (16) |
| C1 | C15 | C20 | C21 | -59.1 (3)    | C15 | C1  | C14 | C9  | 172.37 (16)  |
| C2 | C1  | C14 | C9  | -4.6 (3)     | C15 | C1  | C14 | C13 | -8.1 (3)     |
| C2 | C1  | C14 | C13 | 174.92 (17)  | C15 | C16 | C17 | O1  | -1.8 (3)     |
| C2 | C1  | C15 | C16 | -112.21 (19) | C15 | C16 | C17 | N2  | 178.6 (2)    |
| C2 | C1  | C15 | C20 | 124.36 (18)  | C15 | C20 | C21 | N4  | -178.06 (18) |
| C2 | C3  | C4  | C5  | 1.4 (4)      | C15 | C20 | C21 | C22 | 2.9 (3)      |
| C2 | C7  | C8  | C9  | -2.0 (3)     | C16 | C15 | C20 | C19 | -5.5 (2)     |
| C3 | C2  | C7  | C6  | -2.0 (3)     | C16 | C15 | C20 | C21 | 172.39 (19)  |
| C3 | C2  | C7  | C8  | 178.11 (18)  | C17 | O1  | C19 | N3  | -171.67 (17) |
| C3 | C4  | C5  | C6  | -2.0 (4)     | C17 | O1  | C19 | C20 | 8.3 (3)      |
| C4 | C5  | C6  | C7  | 0.6 (4)      | C18 | C16 | C17 | O1  | 172.82 (18)  |
| C5 | C6  | C7  | C2  | 1.5 (3)      | C18 | C16 | C17 | N2  | -6.8 (3)     |
| C5 | C6  | C7  | C8  | -178.7 (2)   | C19 | O1  | C17 | N2  | 173.30 (18)  |
| C6 | C7  | C8  | C9  | 178.10 (19)  | C19 | O1  | C17 | C16 | -6.3 (3)     |
| C7 | C2  | C3  | C4  | 0.6 (3)      | C19 | N3  | N4  | C21 | -0.4 (2)     |
| C7 | C8  | C9  | C10 | -178.10 (19) | C19 | C20 | C21 | N4  | 0.1 (2)      |
| C7 | C8  | C9  | C14 | 1.8 (3)      | C19 | C20 | C21 | C22 | -178.9 (2)   |
| C8 | C9  | C10 | C11 | 179.5 (2)    | C20 | C15 | C16 | C17 | 7.4 (3)      |
| C8 | C9  | C14 | C1  | 1.6 (3)      | C20 | C15 | C16 | C18 | -167.15 (16) |
| C8 | C9  | C14 | C13 | -178.00 (17) |     |     |     |     |              |

**Table 7 Hydrogen Atom Coordinates ( $\text{\AA}\times 10^4$ ) and Isotropic Displacement Parameters ( $\text{\AA}^2\times 10^3$ ) for RN\_BP\_SC182\_2\_0m\_a.**

| Atom | x       | y       | z       | U(eq) |
|------|---------|---------|---------|-------|
| H2A  | 3031.26 | 4162.13 | 6456.25 | 59    |
| H2B  | 3504.92 | 4207.95 | 7138.85 | 59    |
| H4   | 4319.53 | 2124.74 | 8372.79 | 35    |
| H3   | 2272.99 | 2299.02 | 6003.05 | 41    |
| H4A  | 1675.04 | 1819.55 | 5322.83 | 49    |
| H5   | 1731.1  | 1392.71 | 3341.1  | 49    |
| H6   | 2376.33 | 1492.64 | 2007.5  | 43    |
| H8   | 3128.62 | 1855.6  | 1550.58 | 36    |
| H10  | 3863.89 | 2231.13 | 969.37  | 40    |
| H11  | 4468.64 | 2733.71 | 1461.59 | 41    |
| H12  | 4445.06 | 3178.98 | 3414.77 | 40    |
| H13  | 3849.18 | 3085.49 | 4897.76 | 35    |
| H15  | 2828.13 | 2575.09 | 6639.58 | 30    |
| H22A | 3648.02 | 1636.7  | 6116.85 | 51    |
| H22B | 3290.72 | 1649.06 | 7327.37 | 51    |
| H22C | 3825.47 | 1498.05 | 7554.8  | 51    |

**Table 8 Solvent masks information for RN\_BP\_SC182\_2\_0m\_a.**

| Number | X     | Y     | Z      | Volume | Electron count Content |
|--------|-------|-------|--------|--------|------------------------|
| 1      | 0.250 | 0.000 | -0.518 | 461.5  | 128.5?                 |
| 2      | 0.250 | 0.500 | -0.959 | 461.5  | 128.5?                 |
| 3      | 0.750 | 0.000 | -0.459 | 461.5  | 128.5?                 |
| 4      | 0.750 | 0.500 | -0.018 | 461.5  | 128.5?                 |

## RN\_BP\_SC182\_2\_0m\_a

**Table 1 Crystal data and structure refinement for RN\_BP\_SC182\_2\_0m\_a.**

|                                             |                                                               |
|---------------------------------------------|---------------------------------------------------------------|
| Identification code                         | RN_BP_SC182_2_0m_a                                            |
| Empirical formula                           | C <sub>22</sub> H <sub>16</sub> N <sub>4</sub> O              |
| Formula weight                              | 352.39                                                        |
| Temperature/K                               | 100.00                                                        |
| Crystal system                              | tetragonal                                                    |
| Space group                                 | I4 <sub>1</sub> /a                                            |
| a/Å                                         | 28.496(2)                                                     |
| b/Å                                         | 28.496(2)                                                     |
| c/Å                                         | 10.1953(12)                                                   |
| α/°                                         | 90                                                            |
| β/°                                         | 90                                                            |
| γ/°                                         | 90                                                            |
| Volume/Å <sup>3</sup>                       | 8279.0(17)                                                    |
| Z                                           | 16                                                            |
| ρ <sub>calc</sub> /cm <sup>3</sup>          | 1.131                                                         |
| μ/mm <sup>-1</sup>                          | 0.577                                                         |
| F(000)                                      | 2944.0                                                        |
| Crystal size/mm <sup>3</sup>                | 0.45 × 0.35 × 0.2                                             |
| Radiation                                   | Cu Kα (λ = 1.54178)                                           |
| 2θ range for data collection/°              | 9.212 to 136.642                                              |
| Index ranges                                | -32 ≤ h ≤ 34, -30 ≤ k ≤ 34, -11 ≤ l ≤ 12                      |
| Reflections collected                       | 126607                                                        |
| Independent reflections                     | 3782 [R <sub>int</sub> = 0.0660, R <sub>sigma</sub> = 0.0196] |
| Data/restraints/parameters                  | 3782/0/245                                                    |
| Goodness-of-fit on F <sup>2</sup>           | 1.075                                                         |
| Final R indexes [I >= 2σ (I)]               | R <sub>1</sub> = 0.0639, wR <sub>2</sub> = 0.1982             |
| Final R indexes [all data]                  | R <sub>1</sub> = 0.0653, wR <sub>2</sub> = 0.1999             |
| Largest diff. peak/hole / e Å <sup>-3</sup> | 0.30/-0.32                                                    |

**RN\_BP\_SC185\_0m\_a**

Compound 1o

**Table 1 Crystal data and structure refinement for RN\_BP\_SC185\_0m\_a.**

|                                             |                                                               |
|---------------------------------------------|---------------------------------------------------------------|
| Identification code                         | RN_BP_SC185_0m_a                                              |
| Empirical formula                           | C <sub>22</sub> H <sub>19</sub> N <sub>5</sub> O              |
| Formula weight                              | 369.42                                                        |
| Temperature/K                               | 101.0                                                         |
| Crystal system                              | tetragonal                                                    |
| Space group                                 | I4 <sub>1</sub> /a                                            |
| a/Å                                         | 22.861(2)                                                     |
| b/Å                                         | 22.861(2)                                                     |
| c/Å                                         | 14.185(2)                                                     |
| α/°                                         | 90                                                            |
| β/°                                         | 90                                                            |
| γ/°                                         | 90                                                            |
| Volume/Å <sup>3</sup>                       | 7413.4(17)                                                    |
| Z                                           | 16                                                            |
| ρ <sub>calc</sub> /g/cm <sup>3</sup>        | 1.324                                                         |
| μ/mm <sup>-1</sup>                          | 0.682                                                         |
| F(000)                                      | 3104.0                                                        |
| Crystal size/mm <sup>3</sup>                | 0.18 × 0.12 × 0.12                                            |
| Radiation                                   | Cu Kα (λ = 1.54178)                                           |
| 2θ range for data collection/°              | 7.334 to 136.68                                               |
| Index ranges                                | -25 ≤ h ≤ 27, -27 ≤ k ≤ 25, -17 ≤ l ≤ 16                      |
| Reflections collected                       | 76619                                                         |
| Independent reflections                     | 3383 [R <sub>int</sub> = 0.0823, R <sub>sigma</sub> = 0.0235] |
| Data/restraints/parameters                  | 3383/0/256                                                    |
| Goodness-of-fit on F <sup>2</sup>           | 1.084                                                         |
| Final R indexes [I ≥ 2σ (I)]                | R <sub>1</sub> = 0.0466, wR <sub>2</sub> = 0.1192             |
| Final R indexes [all data]                  | R <sub>1</sub> = 0.0518, wR <sub>2</sub> = 0.1229             |
| Largest diff. peak/hole / e Å <sup>-3</sup> | 0.21/-0.19                                                    |

**Table 2 Fractional Atomic Coordinates ( $\times 10^4$ ) and Equivalent Isotropic Displacement Parameters ( $\text{\AA}^2 \times 10^3$ ) for RN\_BP\_SC185\_0m\_a.  $U_{eq}$  is defined as 1/3 of the trace of the orthogonalised  $U_{IJ}$  tensor.**

| Atom | x           | y           | z           | U(eq)    |
|------|-------------|-------------|-------------|----------|
| O1   | 7001.8 (5)  | 7061.6 (5)  | 2381.9 (9)  | 34.6 (3) |
| N1   | 5500.2 (6)  | 4352.2 (6)  | 4782.1 (11) | 35.2 (4) |
| N2   | 4935.7 (7)  | 6791.5 (7)  | 2451.8 (15) | 50.6 (5) |
| N3   | 6245.5 (7)  | 7648.9 (6)  | 2607.2 (12) | 40.4 (4) |
| N4   | 7793.3 (6)  | 6436.9 (6)  | 2169.3 (10) | 32.3 (3) |
| N5   | 7832.0 (6)  | 5854.8 (6)  | 1955.8 (10) | 31.9 (3) |
| C1   | 6234.0 (7)  | 6006.9 (7)  | 2033.1 (12) | 29.1 (4) |
| C2   | 6040.4 (7)  | 6630.5 (7)  | 2267.2 (12) | 31.7 (4) |
| C3   | 6403.5 (7)  | 7099.1 (7)  | 2410.3 (12) | 32.1 (4) |
| C4   | 7220.2 (7)  | 6516.0 (7)  | 2196.8 (12) | 29.9 (4) |
| C5   | 6890.6 (7)  | 6017.5 (7)  | 2012.6 (11) | 28.9 (4) |
| C6   | 7304.6 (7)  | 5588.8 (7)  | 1863.6 (12) | 30.5 (4) |
| C7   | 7240.9 (8)  | 4950.3 (7)  | 1695.2 (13) | 36.3 (4) |
| C8   | 5431.5 (8)  | 6727.5 (7)  | 2359.9 (14) | 37.8 (4) |
| C9   | 6005.5 (7)  | 5556.8 (7)  | 2739.9 (12) | 28.1 (4) |
| C10  | 5715.3 (7)  | 5051.0 (7)  | 2433.9 (13) | 32.3 (4) |
| C11  | 5527.1 (7)  | 4618.9 (7)  | 3057.2 (13) | 33.7 (4) |
| C12  | 5637.8 (7)  | 4702.1 (7)  | 4011.5 (12) | 30.9 (4) |
| C13  | 5929.6 (7)  | 5208.3 (7)  | 4335.2 (12) | 29.4 (4) |
| C14  | 6106.2 (7)  | 5636.4 (7)  | 3695.6 (12) | 28.5 (4) |
| C15  | 5973.2 (7)  | 5156.9 (8)  | 5347.0 (12) | 33.1 (4) |
| C16  | 6204.2 (8)  | 5517.2 (9)  | 6052.5 (13) | 39.8 (4) |
| C17  | 6154.1 (9)  | 5339.2 (10) | 6985.5 (14) | 48.2 (5) |
| C18  | 5880.4 (9)  | 4813.2 (10) | 7208.5 (14) | 50.0 (5) |
| C19  | 5654.2 (8)  | 4443.4 (9)  | 6527.0 (14) | 43.9 (5) |
| C20  | 5701.3 (7)  | 4624.6 (8)  | 5591.1 (13) | 34.9 (4) |
| C21  | 5175.2 (9)  | 3805.7 (8)  | 4763.8 (15) | 44.1 (5) |
| C22  | 5567.0 (11) | 3273.4 (10) | 4798 (2)    | 69.2 (8) |

**Table 3 Anisotropic Displacement Parameters ( $\text{\AA}^2 \times 10^3$ ) for RN\_BP\_SC185\_0m\_a.  
The Anisotropic displacement factor exponent takes the form:**

$$-2\pi^2[h^2a^2U_{11}+2hka*b*U_{12}+...].$$

| Atom | $U_{11}$  | $U_{22}$  | $U_{33}$  | $U_{23}$  | $U_{13}$  | $U_{12}$  |
|------|-----------|-----------|-----------|-----------|-----------|-----------|
| O1   | 26.7 (6)  | 26.5 (6)  | 50.7 (8)  | -1.4 (5)  | -2.8 (5)  | -0.7 (5)  |
| N1   | 29.4 (8)  | 32.3 (8)  | 43.9 (9)  | 8.3 (6)   | 3.7 (6)   | -1.1 (6)  |
| N2   | 31.1 (9)  | 30.4 (9)  | 90.3 (14) | 3.8 (8)   | 1.5 (8)   | -0.3 (7)  |
| N3   | 28.9 (8)  | 26.8 (8)  | 65.6 (11) | -1.3 (7)  | -1.9 (7)  | -0.5 (6)  |
| N4   | 30.4 (7)  | 28.3 (7)  | 38.2 (8)  | -0.1 (6)  | -0.5 (6)  | -0.5 (6)  |
| N5   | 28.1 (7)  | 28.8 (7)  | 38.9 (8)  | -0.9 (6)  | 2.5 (6)   | 1.2 (6)   |
| C1   | 27.4 (8)  | 27.8 (8)  | 32.1 (9)  | 1.3 (6)   | -2.5 (6)  | -1.5 (7)  |
| C2   | 27.3 (8)  | 28.3 (9)  | 39.6 (10) | 4.0 (7)   | -1.1 (7)  | -0.7 (7)  |
| C3   | 26.5 (8)  | 30.6 (9)  | 39.3 (10) | 3.4 (7)   | -2.4 (7)  | 0.6 (7)   |
| C4   | 29.5 (9)  | 27.2 (8)  | 33.1 (9)  | 2.0 (7)   | -0.8 (7)  | 0.0 (7)   |
| C5   | 28.2 (8)  | 29.6 (8)  | 28.8 (8)  | 2.1 (6)   | -0.1 (6)  | -2.6 (7)  |
| C6   | 30.4 (9)  | 31.3 (9)  | 29.9 (9)  | 0.9 (7)   | 1.4 (7)   | -1.8 (7)  |
| C7   | 36.8 (9)  | 31.4 (9)  | 40.7 (10) | -4.1 (7)  | 2.5 (8)   | -0.8 (7)  |
| C8   | 33.5 (10) | 24.5 (8)  | 55.3 (12) | 4.2 (8)   | -1.2 (8)  | -2.1 (7)  |
| C9   | 23.8 (8)  | 27.8 (8)  | 32.8 (9)  | 1.7 (6)   | -0.4 (6)  | 1.3 (6)   |
| C10  | 31.3 (9)  | 30.7 (9)  | 35.0 (9)  | -1.8 (7)  | -0.4 (7)  | -1.1 (7)  |
| C11  | 31.4 (9)  | 27.2 (9)  | 42.4 (10) | -2.2 (7)  | 0.2 (7)   | -4.4 (7)  |
| C12  | 24.4 (8)  | 29.6 (8)  | 38.5 (10) | 4.2 (7)   | 2.6 (7)   | 1.0 (7)   |
| C13  | 23.2 (8)  | 30.8 (9)  | 34.1 (9)  | 0.6 (7)   | 0.3 (6)   | 3.5 (6)   |
| C14  | 23.3 (8)  | 26.2 (8)  | 35.9 (9)  | -1.3 (7)  | -1.3 (6)  | 0.1 (6)   |
| C15  | 25.5 (8)  | 37.4 (9)  | 36.3 (9)  | 2.4 (7)   | 0.6 (7)   | 6.0 (7)   |
| C16  | 35.6 (10) | 46.5 (11) | 37.3 (10) | -0.4 (8)  | -3.2 (8)  | 6.1 (8)   |
| C17  | 47.3 (12) | 62.9 (14) | 34.4 (10) | -1.3 (9)  | -5.0 (8)  | 13.5 (10) |
| C18  | 42.4 (11) | 71.9 (15) | 35.8 (10) | 10.9 (10) | 2.1 (8)   | 19.0 (10) |
| C19  | 31.1 (9)  | 53.1 (12) | 47.5 (11) | 16.1 (9)  | 7.4 (8)   | 11.5 (8)  |
| C20  | 26.2 (8)  | 41.1 (10) | 37.2 (10) | 7.3 (8)   | 2.4 (7)   | 7.6 (7)   |
| C21  | 38.2 (10) | 35.4 (10) | 58.6 (13) | 10.1 (9)  | 5.9 (9)   | -5.3 (8)  |
| C22  | 59.6 (15) | 34.2 (11) | 114 (2)   | 0.8 (12)  | 24.5 (14) | -2.4 (10) |



**Table 4 Bond Lengths for RN\_BP\_SC185\_0m\_a.**

| Atom | Atom | Length/Å  | Atom | Atom | Length/Å  |
|------|------|-----------|------|------|-----------|
| O1   | C3   | 1.371 (2) | C5   | C6   | 1.379 (2) |
| O1   | C4   | 1.369 (2) | C6   | C7   | 1.486 (2) |
| N1   | C12  | 1.390 (2) | C9   | C10  | 1.402 (2) |
| N1   | C20  | 1.384 (2) | C9   | C14  | 1.387 (2) |
| N1   | C21  | 1.454 (2) | C10  | C11  | 1.394 (2) |
| N2   | C8   | 1.150 (2) | C11  | C12  | 1.390 (3) |
| N3   | C3   | 1.337 (2) | C12  | C13  | 1.413 (2) |
| N4   | N5   | 1.368 (2) | C13  | C14  | 1.394 (2) |
| N4   | C4   | 1.323 (2) | C13  | C15  | 1.443 (2) |
| N5   | C6   | 1.357 (2) | C15  | C16  | 1.400 (3) |
| C1   | C2   | 1.529 (2) | C15  | C20  | 1.410 (3) |
| C1   | C5   | 1.502 (2) | C16  | C17  | 1.389 (3) |
| C1   | C9   | 1.529 (2) | C17  | C18  | 1.392 (3) |
| C2   | C3   | 1.370 (2) | C18  | C19  | 1.384 (3) |
| C2   | C8   | 1.416 (2) | C19  | C20  | 1.395 (3) |
| C4   | C5   | 1.391 (2) | C21  | C22  | 1.512 (3) |

**Table 5 Bond Angles for RN\_BP\_SC185\_0m\_a.**

| Atom | Atom | Atom | Angle/°     | Atom | Atom | Atom | Angle/°     |
|------|------|------|-------------|------|------|------|-------------|
| C4   | O1   | C3   | 115.25 (13) | N2   | C8   | C2   | 177.9 (2)   |
| C12  | N1   | C21  | 126.58 (16) | C10  | C9   | C1   | 120.91 (15) |
| C20  | N1   | C12  | 108.53 (14) | C14  | C9   | C1   | 119.75 (14) |
| C20  | N1   | C21  | 124.82 (15) | C14  | C9   | C10  | 119.29 (15) |
| C4   | N4   | N5   | 101.75 (13) | C11  | C10  | C9   | 122.29 (16) |
| C6   | N5   | N4   | 113.56 (14) | C12  | C11  | C10  | 117.68 (16) |
| C5   | C1   | C2   | 106.16 (13) | N1   | C12  | C13  | 108.82 (15) |
| C5   | C1   | C9   | 111.41 (13) | C11  | C12  | N1   | 130.21 (16) |
| C9   | C1   | C2   | 112.71 (14) | C11  | C12  | C13  | 120.97 (15) |
| C3   | C2   | C1   | 125.84 (15) | C12  | C13  | C15  | 106.79 (15) |
| C3   | C2   | C8   | 117.35 (15) | C14  | C13  | C12  | 120.02 (16) |
| C8   | C2   | C1   | 116.80 (14) | C14  | C13  | C15  | 133.18 (16) |
| N3   | C3   | O1   | 109.54 (14) | C9   | C14  | C13  | 119.74 (15) |
| N3   | C3   | C2   | 127.02 (16) | C16  | C15  | C13  | 133.55 (17) |
| C2   | C3   | O1   | 123.44 (15) | C16  | C15  | C20  | 119.92 (17) |
| O1   | C4   | C5   | 125.79 (15) | C20  | C15  | C13  | 106.51 (15) |
| N4   | C4   | O1   | 119.42 (14) | C17  | C16  | C15  | 118.53 (19) |
| N4   | C4   | C5   | 114.78 (15) | C16  | C17  | C18  | 120.4 (2)   |
| C4   | C5   | C1   | 123.46 (15) | C19  | C18  | C17  | 122.46 (19) |
| C6   | C5   | C1   | 132.66 (15) | C18  | C19  | C20  | 117.04 (19) |
| C6   | C5   | C4   | 103.85 (15) | N1   | C20  | C15  | 109.33 (15) |
| N5   | C6   | C5   | 106.06 (14) | N1   | C20  | C19  | 129.05 (18) |
| N5   | C6   | C7   | 122.86 (15) | C19  | C20  | C15  | 121.61 (18) |
| C5   | C6   | C7   | 130.96 (16) | N1   | C21  | C22  | 112.86 (17) |

**Table 6 Torsion Angles for RN\_BP\_SC185\_0m\_a.**

| A  | B   | C   | D   | Angle/°      | A   | B   | C   | D   | Angle/°      |
|----|-----|-----|-----|--------------|-----|-----|-----|-----|--------------|
| O1 | C4  | C5  | C1  | -2.7 (3)     | C9  | C1  | C5  | C6  | 55.2 (2)     |
| O1 | C4  | C5  | C6  | 179.38 (16)  | C9  | C10 | C11 | C12 | -0.2 (3)     |
| N1 | C12 | C13 | C14 | -178.92 (14) | C10 | C9  | C14 | C13 | 1.4 (2)      |
| N1 | C12 | C13 | C15 | 0.48 (18)    | C10 | C11 | C12 | N1  | 179.61 (16)  |
| N4 | N5  | C6  | C5  | 0.72 (19)    | C10 | C11 | C12 | C13 | 0.2 (2)      |
| N4 | N5  | C6  | C7  | -175.89 (15) | C11 | C12 | C13 | C14 | 0.6 (2)      |
| N4 | C4  | C5  | C1  | 178.34 (15)  | C11 | C12 | C13 | C15 | -179.95 (15) |
| N4 | C4  | C5  | C6  | 0.4 (2)      | C12 | N1  | C20 | C15 | -0.05 (18)   |
| N5 | N4  | C4  | O1  | -179.04 (14) | C12 | N1  | C20 | C19 | 178.76 (17)  |
| N5 | N4  | C4  | C5  | -0.02 (19)   | C12 | N1  | C21 | C22 | 99.6 (2)     |
| C1 | C2  | C3  | O1  | -1.6 (3)     | C12 | C13 | C14 | C9  | -1.4 (2)     |
| C1 | C2  | C3  | N3  | 179.35 (17)  | C12 | C13 | C15 | C16 | -178.86 (18) |
| C1 | C5  | C6  | N5  | -178.28 (17) | C12 | C13 | C15 | C20 | -0.50 (18)   |
| C1 | C5  | C6  | C7  | -2.1 (3)     | C13 | C15 | C16 | C17 | 177.71 (18)  |
| C1 | C9  | C10 | C11 | 176.81 (15)  | C13 | C15 | C20 | N1  | 0.35 (18)    |
| C1 | C9  | C14 | C13 | -176.05 (14) | C13 | C15 | C20 | C19 | -178.57 (15) |
| C2 | C1  | C5  | C4  | 1.0 (2)      | C14 | C9  | C10 | C11 | -0.6 (2)     |
| C2 | C1  | C5  | C6  | 178.25 (17)  | C14 | C13 | C15 | C16 | 0.4 (3)      |
| C2 | C1  | C9  | C10 | 129.26 (16)  | C14 | C13 | C15 | C20 | 178.79 (17)  |
| C2 | C1  | C9  | C14 | -53.3 (2)    | C15 | C13 | C14 | C9  | 179.37 (17)  |
| C3 | O1  | C4  | N4  | -179.04 (15) | C15 | C16 | C17 | C18 | 0.1 (3)      |
| C3 | O1  | C4  | C5  | 2.1 (2)      | C16 | C15 | C20 | N1  | 178.97 (15)  |
| C4 | O1  | C3  | N3  | 179.24 (15)  | C16 | C15 | C20 | C19 | 0.1 (3)      |
| C4 | O1  | C3  | C2  | 0.1 (2)      | C16 | C17 | C18 | C19 | 0.8 (3)      |
| C4 | N4  | N5  | C6  | -0.44 (18)   | C17 | C18 | C19 | C20 | -1.2 (3)     |
| C4 | C5  | C6  | N5  | -0.66 (18)   | C18 | C19 | C20 | N1  | -177.94 (17) |
| C4 | C5  | C6  | C7  | 175.57 (17)  | C18 | C19 | C20 | C15 | 0.7 (3)      |
| C5 | C1  | C2  | C3  | 1.0 (2)      | C20 | N1  | C12 | C11 | -179.78 (17) |
| C5 | C1  | C2  | C8  | -177.81 (15) | C20 | N1  | C12 | C13 | -0.27 (18)   |
| C5 | C1  | C9  | C10 | -111.51 (17) | C20 | N1  | C21 | C22 | -83.7 (2)    |
| C5 | C1  | C9  | C14 | 65.88 (19)   | C20 | C15 | C16 | C17 | -0.5 (3)     |
| C8 | C2  | C3  | O1  | 177.17 (16)  | C21 | N1  | C12 | C11 | -2.6 (3)     |
| C8 | C2  | C3  | N3  | -1.8 (3)     | C21 | N1  | C12 | C13 | 176.92 (16)  |
| C9 | C1  | C2  | C3  | 123.24 (18)  | C21 | N1  | C20 | C15 | -177.31 (15) |
| C9 | C1  | C2  | C8  | -55.6 (2)    | C21 | N1  | C20 | C19 | 1.5 (3)      |
| C9 | C1  | C5  | C4  | -122.04 (17) |     |     |     |     |              |

**Table 7 Hydrogen Atom Coordinates ( $\text{\AA} \times 10^4$ ) and Isotropic Displacement Parameters ( $\text{\AA}^2 \times 10^3$ ) for RN\_BP\_SC185\_0m\_a.**

| Atom | x       | y       | z       | U(eq) |
|------|---------|---------|---------|-------|
| H3A  | 5872.7  | 7739.7  | 2657    | 48    |
| H3B  | 6514.33 | 7919.96 | 2687.02 | 48    |
| H5   | 8167.05 | 5670.35 | 1884.94 | 38    |
| H1   | 6086.85 | 5902.74 | 1390.73 | 35    |
| H7A  | 7610.19 | 4792.52 | 1453.59 | 54    |
| H7B  | 6929.67 | 4882.83 | 1232.7  | 54    |
| H7C  | 7140.78 | 4754.58 | 2288.31 | 54    |
| H10  | 5644.45 | 5001    | 1778.96 | 39    |
| H11  | 5330.11 | 4279.31 | 2837.6  | 40    |
| H14  | 6294.65 | 5981.19 | 3913.47 | 34    |
| H16  | 6391.05 | 5875.62 | 5896.8  | 48    |
| H17  | 6307.73 | 5578.08 | 7474.5  | 58    |
| H18  | 5847.64 | 4703.8  | 7852.44 | 60    |
| H19  | 5474.86 | 4082.4  | 6689.54 | 53    |
| H21A | 4936.63 | 3790.83 | 4181.88 | 53    |
| H21B | 4904.62 | 3795.38 | 5308.45 | 53    |
| H22A | 5811.25 | 3261.51 | 4230.93 | 104   |
| H22B | 5326.03 | 2919.32 | 4828.56 | 104   |
| H22C | 5817.56 | 3294.27 | 5357.83 | 104   |

## RN\_BP\_SC185\_0m\_a

**Table 1 Crystal data and structure refinement for RN\_BP\_SC185\_0m\_a.**

|                                    |                                                |
|------------------------------------|------------------------------------------------|
| Identification code                | RN_BP_SC185_0m_a                               |
| Empirical formula                  | $\text{C}_{22}\text{H}_{19}\text{N}_5\text{O}$ |
| Formula weight                     | 369.42                                         |
| Temperature/K                      | 101.0                                          |
| Crystal system                     | tetragonal                                     |
| Space group                        | $I4_1/a$                                       |
| a/ $\text{\AA}$                    | 22.861(2)                                      |
| b/ $\text{\AA}$                    | 22.861(2)                                      |
| c/ $\text{\AA}$                    | 14.185(2)                                      |
| $\alpha/^\circ$                    | 90                                             |
| $\beta/^\circ$                     | 90                                             |
| $\gamma/^\circ$                    | 90                                             |
| Volume/ $\text{\AA}^3$             | 7413.4(17)                                     |
| Z                                  | 16                                             |
| $\rho_{\text{calc}}/\text{g/cm}^3$ | 1.324                                          |
| $\mu/\text{mm}^{-1}$               | 0.682                                          |
| F(000)                             | 3104.0                                         |
| Crystal size/ $\text{mm}^3$        | $0.18 \times 0.12 \times 0.12$                 |

|                                                  |                                                                    |
|--------------------------------------------------|--------------------------------------------------------------------|
| Radiation                                        | Cu K $\alpha$ ( $\lambda = 1.54178$ )                              |
| 2 $\Theta$ range for data collection/ $^{\circ}$ | 7.334 to 136.68                                                    |
| Index ranges                                     | $-25 \leq h \leq 27$ , $-27 \leq k \leq 25$ , $-17 \leq l \leq 16$ |
| Reflections collected                            | 76619                                                              |
| Independent reflections                          | 3383 [ $R_{\text{int}} = 0.0823$ , $R_{\text{sigma}} = 0.0235$ ]   |
| Data/restraints/parameters                       | 3383/0/256                                                         |
| Goodness-of-fit on $F^2$                         | 1.084                                                              |
| Final R indexes [ $I \geq 2\sigma(I)$ ]          | $R_1 = 0.0466$ , $wR_2 = 0.1192$                                   |
| Final R indexes [all data]                       | $R_1 = 0.0518$ , $wR_2 = 0.1229$                                   |
| Largest diff. peak/hole / e $\text{\AA}^{-3}$    | 0.21/-0.19                                                         |
